# Supplementary material
Source: Research Square preprint supplement (doi:10.21203/rs.3.rs-9343418/v1)
Supplement: Supplementary file 1 [file e95509de366492c98e6a3386.docx]

**Supporting information**

**Synthesis and biological evaluation of spirofused pyrazole and pyrrolidine hybrids from tryptanthrin**

*Devika Krishnan,a Sruthi S. L.,a Ashkar Ali B., b E. G. Jayasree,b Aparna Sahooc,d, Ankita Lamac,d, Sidharth Chopra,c,d and Ani Deepthia,**

*aDepartment of Chemistry, University of Kerala, Kariavattom campus, Thiruvananthapuram-695581, Kerala, India*

*bDepartment of Applied Chemistry, Cochin University of Science and Technology, Kochi, 682022, Kerala, India*

*cDivision of Molecular Microbiology and Immunology, CSIR-Central Drug Research Institute, Sector 10, Janakipuram Extension, Sitapur Road, Lucknow 226031, Uttar Pradesh, India*

*dAcSIR: Academy of Scientific and Innovative Research (AcSIR), Ghaziabad 201002, India*

Email: [*anideepthi@gmail.com*](mailto:anideepthi@gmail.com)

**Table of Contents**

| SL. No | Contents | Page No. |
| --- | --- | --- |
| 1 | Chemicals and Techniques | 1 |
| 2 | General Procedure | 2 |
| 3 | Spectral Data | 2-10 |
| 4 | Spectra | 10-32 |

**1. Chemicals and Techniques**

All the derivatives were prepared using tryptanthrins (synthesized using isatins, isatoic anhydrides and triethylamine), benzoic hydrazide and isoniazid under reflux conditions in toluene at 110 ⁰C. All the starting materials, chemical reagents and solvents were purchased from commercial sellers and are used as such without any further purification. The reaction progress was monitored by thin-layer chromatography (TLC) performed on silica gel 60 F254 pre-coated aluminium sheets. TLC was visualized by a 254 nm UV lamp and iodine staining. NMR spectra were recorded on a 400MHz Bruker Avance FTNMR spectrometer using CDCl3 and DMSO as solvents. Tetramethylsilane (TMS) was used as internal standard (signal at 0 ppm) for 1H chemical shifts measurements, and coupling constants (J) are reported in hertz (Hz). FTIR spectra were recorded on an Agilent Cary 630 FTIR spectrometer. CHN data was recorded using Perkin Elmer 2400 Series II CHNS/O analyser and melting points were recorded using Optics Technology digital melting/ boiling point apparatus.

**2. General procedure**

**2.1. General procedure for the synthesis of tryptanthrins (1a-h)**

Tryptanthrin derivatives were synthesized from the corresponding isatins and isatoic anhydrides according to a previously reported pro­cedure [7]. Isatin (1 mmol) was taken in a round bottom flask, followed by the addition of isatoic anhydride (1 mmol) and triethylamine (5 mmol). A minimal amount of dry toluene was added as solvent and the reaction mixture was refluxed at 110℃ for three hours. The precipitated product was filtered, washed using methanol and dried. The product was recrystallized from ethanol.

**2.2 General procedure for the synthesis of Spiropyrazole compounds (3a-k)**

Hydrazonyl chloride (0.25 mmol) was stirred in acetonitrile in a 50 ml round-bottom flask at room temperature followed by the addition of triethylamine (0.25 mmol) as base for the *in-situ* generation of nitrile imine. It is then added with tryptanthrin ylidene (0.25 mmol and allowed to stir for 3-4 hours. The completion of reaction was observed from TLC, and the product was isolated by silica gel column chromatography using 80:20 hexane-ethyl acetate in 78- 92% yield.

**2.3 General procedure for the synthesis of dispiropyrrolidine compounds (6a-k)**

The dispiropyrrolidine compounds were synthesized by a three-component reaction of isatin (1 mmol), sarcosine (2 mmol) and tryptanthrin ylidene (1 mmol) by refluxing in ethanol- toluene mixture for 85℃ until complete consumption of isatin was observed from TLC. The product was isolated by silica gel column chromatography using 70:30 hexane-ethyl acetate in 70- 91% yield.

**3. Spectral data**

**3.1 Ethyl-12-oxo-2',5'-diphenyl-2',4'-dihydro-12H-spiro[indolo[2,1-b]quinazoline-6,3'-pyrazole]-4'-carboxylat**e**, C32H24N4O3, (3a):** Light yellow powder; Yield: 92%; mp: 278-280 ℃; FTIR (cm-1): 3030, 2917, 1713, 1672, 1639, 1590, 1337, 1315. 1H NMR (δ ppm, 400 MHz, CDCl3):8.66 (d, *J*=8 Hz, 1H), 8.48 (d, *J*=8 Hz, 1H), 7.78-7.74 (m, 4H), 7.61-7.55 (m, 2H), 7.47-7.42 (m, 4H), 7.28-7.24 (m, 1H), 7.02 (t, *J*=8 Hz, 2H), 6.77-6.74 (m, 3H), 5.24 (s, 1H), 3.78 (q, *J*=10.1 Hz, 2H), 0.81 (t, *J*=7.2 Hz, 3H). 13C NMR (δ ppm, 100 MHz, CDCl3):166.5, 163.8, 159.7, 159.0, 147.1, 144.1, 142.6, 139.3, 134.7, 131.6, 131.2, 129.0, 128.9, 128.6, 128.4, 128.3, 127.8, 127.5, 126.9, 126.8, 126.7, 126.1, 125.9, 121.7, 121.3, 117.2, 115.5, 115.3, 65.5, 61.7, 29.7, 13.5. Elemental Analysis:Analytically calculated (%): C, 74.99; H, 4.72; N, 10.93; O, 9.36 Found %: C, 7.98; H, 4.73; N, 10.94

**3.2 Ethyl-8-chloro-12-oxo-2',5'-diphenyl-2',4'-dihydro-12H-spiro[indolo[2,1-b]quinazoline-6,3'-pyrazole]-4'-carboxylate; C32H23ClN4O3, (3b):** Light yellow powder; Yield: 88%; mp: 273-275 ℃; FTIR (cm-1): 3032, 2919, 1717, 1679, 1632, 1593,1339, 1317. 1H NMR (δ ppm, 400 MHz, CDCl3):8.52 (d, *J*=8.4 Hz, 1H), 8.37-8.35 (dd, *J*=8 Hz, *J*=0.8 Hz, 1H), 7.69-7.64 (m, 4H), 7.52-7.47 (m, 1H), 7.43-7.40 (m, 1H), 7.37-7.31 (m, 4H), 7.02 (t, *J*=8 Hz, 2H), 6.95 (t, *J*=8 Hz, 2H), 6.72-6.66 (m, 3H), 5.1 (s, 1H), 3.78 (q, *J*=7.2 Hz, 2H), 0.81 (t, *J*=7.2 Hz, 3H). 13C NMR (δ ppm, 100 MHz, CDCl3):166.4, 163.4, 160.8, 159.5, 147.0, 144.3, 142.4, 140.2, 134.8, 132.5, 131.3, 130.4, 129.7, 129.2, 129.1, 128.6, 128.5, 128.3, 128.0, 127.5, 127.0, 126.1, 125.74, 123.5, 122.7, 121.6, 118.2, 115.3, 65.7, 62.0, 29.5, 13.5. Elemental Analysis: Analytically calculated %: C,70.26; H, 4.24; Cl, 6.48; N, 10.24; O, 8.77 Found %: C, 70.27; H, 4.25; N, 10.25.

**3.3 Ethyl-8-bromo-12-oxo-2',5'-diphenyl-2',4'-dihydro-12H-spiro[indolo[2,1-b]quinazoline-6,3'-pyrazole]-4'-carboxylate; C32H23BrN4O3,** **(3c):** Light yellow powder; Yield: 85%; mp: 276-278 ℃; FTIR (cm-1): 3034, 2919, 1715, 1675, 1636, 1598, 1335, 1318. 1H NMR (δ ppm, 400 MHz, CDCl3):8.56 (d, *J*=8.4 Hz, 1H) 8.45 (d, *J*=8 Hz, 1H), 7.79-7.74 (m, 4H), 7.69-7.66 (dd, *J*=8.8 Hz, *J*=2 Hz, 1H) 7.61-7.57 (dt, *J*=7.3 Hz, *J*=4.3 Hz, 2H), 7.47-7.41 (m, 3H), 7.05 (t, *J*=8 Hz, 2H), 6.82-6.75 (m, 3H), 5.22 (s, 1H), 3.88 (q, *J*=9.2 Hz, 2H), 0.92 (t, *J*=7.2 Hz, 3H).13C NMR (δ ppm, 100 MHz, CDCl3): 170.6, 166.4, 159.5, 159.4, 146.5, 145.6, 142.9, 140.3, 140.2, 138.2, 134.8, 134.2, 133.9, 131.4, 129.8, 129.3, 129.1, 128.6, 128.5, 126.4, 126.1, 125.7, 123.5, 122.0, 121.6, 118.4, 115.8, 115.3, 65.8, 62.0, 29.7, 13.6. Elemental Analysis: Analytically calculated %: C, 64.50; H, 3.29; N, 10.75. Found %: C, 64.52; H, 3.31; N, 10.77.

**3.4 Ethyl-8-fluoro-12-oxo-2',5'-diphenyl-2',4'-dihydro-12H-spiro[indolo[2,1-b]quinazoline-6,3'-pyrazole]-4'-carboxylate; C32H23FN4O3 (3d):** Yellow powder; Yield: 87%; mp: 280-282 ℃; FTIR (cm-1): 3171, 3051, 1680, 1628, 1546, 1456, 1337, 1248, 1156, 1061. 1H NMR (δ ppm, 400 MHz, CDCl3):8.53 (q, *J*=4.4 Hz, 1H), 8.31 (d, *J*=1.6 Hz, 2H), 7.66 - 7.60 (m, 4H), 7.36-7.32 (m, 3H), 7.14-7.08 (m, 3H), 6.95 (t, *J*=8 Hz, 2H), 6.72-6.63 (m, 2H), 5.12 (s, 1H), 3.78 (q, *J*=4.6 Hz, 2H), 0.80 (t, *J*=7 Hz, 3H). 13C NMR (δ ppm, 100 MHz, CDCl3):165.3, 158.7, 158.0, 157.2, 144.4, 143.4, 141.4, 134.2, 134.1, 133.0, 130.3, 128.7, 128.2, 128.0, 127.6, 125.3, 125.1, 121.7, 120.8, 117.7, 117.6, 117.2, 116.9, 114.4, 112.8, 112.5, 64.5, 61.0, 28.6, 12.6. Elemental Analysis: Analytical calculated (%): C, 72.44; H, 4.37; N, 10.56. Found (%): 72.40; H, 4.35; N, 10.52.

**3.5 Ethyl-8-methoxy-12-oxo-2',5'-diphenyl-2',4'-dihydro-12H-spiro[indolo[2,1-b]quinazoline-6,3'-pyrazole]-4'-carboxylate; C33H26N4O4 (3e):** Yellow powder; Yield: 78%; mp: 286-288 ℃; FTIR (cm-1): 3170, 3059, 1672, 1630, 1540, 1450, 1330, 1250, 1158, 1065. 1H NMR (δ ppm, 400 MHz, CDCl3):8.61 (d, *J*=8.8 Hz, 1H) 8.45 (t, *J*=6.2 Hz, 1H), 7.84 (d, *J*=8 Hz, 1H), 7.81-7.74 (m, 2H) 7.69-7.58 (m, 2H), 7.53-7.41 (m, 3H), 7.07-6.96 (m, 2H), 6.94-6.85 (m, 3H), 6.78 (q, *J*=8.4 Hz, 2H), 5.22 (s, 1H), 3.87 (q, *J*=7.2 Hz, 2H), 3.76 (s, 3H), 0.80 (t, *J*=7.28 Hz, 3H). 13C NMR (δ ppm, 100 MHz, CDCl3):166.3, 166.1, 158.5, 158.3, 145.5, 145.1, 144.4, 142.4, 137.9, 136.8, 135.2, 134.3, 134.1, 131.3, 129.8, 129.7, 129.3, 129.1, 129.0, 128.7, 126.4, 126.2, 126.1, 122.7, 121.8, 120.3, 118.7, 115.4, 65.7, 62.1, 57.1, 29.3, 13.6. Elemental Analysis: Analytical calculated (%): C, 73.05; H, 4.83; N, 10.33. Found (%): C, 73.01; H, 4.85; N, 10.30.

**3.6 Ethyl 8-bromo-2-chloro-12-oxo-2',5'-diphenyl-2',4'-dihydro-12H-spiro[indolo[2,1-b]quinazoline-6,3'-pyrazole]-4'-carboxylate; C32H22BrClN4O3,** **(3f):** Yellow powder; Yield: 83%; mp: 288-290 ℃;FTIR (cm-1): 3032, 2914, 1717, 1677, 1637, 1599, 1334, 1312. 1H NMR (δ ppm, 400 MHz, CDCl3): 8.44 (d, *J*=8.8 Hz, 1H), 8.30 (d, *J*=2.4 Hz, 1H), 7.66-7.51 (m, 5H), 7.51 (d, *J*=2.4 Hz, 1H), 7.38-7.32 (m, 3H), 6.95 (2H, t, *J*= 8Hz), 6.73-6.64 (3H, m), 5.09 (s, 1H), 3.80 (q, *J*=2.9 Hz, 2H), 0.83 (t, *J*=7.2 Hz, 3H).13C NMR (δ ppm, 100 MHz, CDCl3): 168.6,166.3, 158.5, 158.3, 145.5, 144.4, 142.4, 137.9, 135.2, 134.3, 134.1, 131.3, 129.8, 129.3, 129.1, 129.0, 128.7, 126.4, 126.1, 122.7, 121.8, 120.3, 119.0, 118.6, 115.4, 115.4, 65.7, 62.1, 29.7, 13.6. Elemental Analysis: Analytical calculated (%): C, 61.41; H, 3.54; N, 8.95. Found (%): C, 61.40; H, 3.55; N, 8.92.

**3.7 Ethyl-8-bromo-2'-(4-fluorophenyl)-12-oxo-5'-phenyl-2',4'-dihydro-12H-spiro[indolo[2,1-b]quinazoline-6,3'-pyrazole]-4'-carboxylate; C32H22BrFN4O3 (3g):** Yellow powder; Yield: 82%; mp: 290-292 ℃; FTIR (cm-1): 3178, 3045, 1685, 1630, 1545, 1450, 1335, 1240, 1160, 1070. 1H NMR (δ ppm, 400 MHz, CDCl3):8.62 (d, *J*=2 Hz, 1H), 8.38 (d, *J*=7.6 Hz, 1H), 7.82-7.77 (m, 1H), 7.72-7.69 (m, 1H), 7.67-7.60 (m, 2H), 7.52 (t, *J*=7.4 Hz, 1H), 7.05 (t, *J*=8.6 Hz, 3H), 6.95 (t, *J*=8Hz, 3H), 6.71 (q, *J*=7.2 Hz, 2H), 6.64 (d, *J*=7.6 Hz, 1H), 5.11 (s, 1H), 3.73 (q, *J*=3.3 Hz, 2H), 0.78 (t, *J*=8.6 Hz, 3H). 13C NMR (δ ppm, 100 MHz, CDCl3):166.3, 162.8, 159.8, 159.4, 146.8, 142.4, 140.0, 137.1, 135.2, 135.0, 130.2, 129.9, 129.0, 128.3, 128.1, 128.0, 127.9, 127.1, 126.9, 126.7, 125.0, 121.8, 117.7, 115.9, 115.7, 115.5, 65.4, 62.0, 29.7, 14.1. Elemental Analysis: Analytical calculated (%): C, 63.06; H, 3.64; N, 9.19; Found (%): C, 63.05; H, 3.66; N, 9.18.

**3.8 Ethyl-8-bromo-2-chloro-2'-(4-fluorophenyl)-12-oxo-5'-phenyl-2',4'-dihydro-12H-spiro[indolo[2,1-b]quinazoline-6,3'-pyrazole]-4'-carboxylate; C32H21BrClFN4O3 (3h):** Yellow powder; Yield: 80%; mp: 296-298 ℃; FTIR (cm-1): 3172, 3051, 1682, 1630, 1552, 1455, 1335, 1250, 1158, 1065. 1H NMR (δ ppm, 400 MHz, CDCl3):8.44 (d, *J*=8.4 Hz, 1H), 8.31 (d, *J*=2.4 Hz, 1H), 7.65-7.58 (m, 5H), 7.49 (d, *J*=2 Hz, 1H), 7.05 (t, *J*=8.6 Hz, 2H), 6.98-6.92 (m, 2H), 6.72 (t, *J*=7.2 Hz, 1H), 6.63 (d, *J*=7.6 Hz, 2H), 5.07 (s, 1H), 3.79 (q, *J*=2.6 Hz, 2H), 0.83 (t, *J*=7.2 Hz, 3H). 13C NMR (δ ppm, 100 MHz, CDCl3):166.2, 160.3, 158.4, 158.3, 145.4, 143.4, 142.4, 137.9, 135.2, 134.3, 134.2, 129.8, 129.1, 128.9, 128.8, 128.0, 127.9, 126.4, 122.7, 121.9, 120.3, 118.7, 115.9, 115.7, 115.4, 65.6, 62.2, 29.7, 13.6. Elemental Analysis: Analytical calculated (%): C, 59.69; H, 3.29; N, 8.70; Found (%): C, 59.66; H, 3.28; N, 8.69

**3.9 Ethyl (4'S,6S)-8-bromo-12-oxo-5'-phenyl-2'-(4-(trifluoromethyl)phenyl)-2',4'-dihydro-12H-spiro[indolo[2,1-b]quinazoline-6,3'-pyrazole]-4'-carboxylate; C33H22BrF3N4O3 (3i):** Yellow powder; Yield: 87%; mp: 300-302 ℃; FTIR (cm-1): 3175, 3051, 1680, 1630, 1544, 1450, 1335, 1240, 1150, 1060. 1H NMR (δ ppm, 400 MHz, CDCl3):8.38 (d, *J*=1.6 Hz, 1H), 8.36 (d, *J*=1.2 Hz, 1H), 7.99-7.91 (m, 1H), 7.75-7.67 (m, 3H), 7.62-7.58 (m, 4H), 7.54-7.51 (m, 1H), 7.47-7.45 (m, 1H), 6.98 (t, *J*=8 Hz, 2H), 6.75-6.67 (m, 2H), 5.13 (s, 1H), 3.79 (q, *J*=7.2 Hz, 2H), 0.82 (t, *J*=6 Hz, 3H). 13C NMR (δ ppm, 100 MHz, CDCl3):167.2, 166.1, 159.5, 158.4, 146.3, 142.0, 140.8, 138.2, 134.9, 134.4, 130.9, 129.5, 129.2, 128.8, 128.3, 128.2, 127.0, 126.4, 126.2, 125.6, 124.6, 123.7, 123.2, 122.2, 120.1, 118.6, 115.8, 115.5, 65.3, 62.3, 29.7, 14.1. Elemental Analysis: Analytical calculated (%): C, 60.10; H, 3.36; N, 8.50; Found (%): C, 60.12; H, 3.34; N, 8.51.

**3.10 Ethyl(4'S,6S)-8-bromo-2-chloro-12-oxo-5'-phenyl-2'-(4-(trifluoromethyl)phenyl)-2',4'-dihydro-12H-spiro[indolo[2,1-b]quinazoline-6,3'-pyrazole]-4'-carboxylate; C33H21BrClF3N4O3 (3j):** Yellow powder; Yield: 85%; mp: 295-297 ℃; FTIR (cm-1): 3168, 3050, 1685, 1636, 1550, 1459, 1340, 1250, 1158, 1065. 1H NMR (δ ppm, 400 MHz, CDCl3):8.44 (d, *J*=8.8 Hz, 1H), 8.31 (d, *J*=2.4 Hz, 1H), 7.74 (d, *J*=8.4 Hz, 2H), 7.65-7.56 (m, 5H), 7.48 (d, *J*=1.6 Hz, 1H), 6.98 (t, *J*=8 Hz, 2H), 6.75 (t, *J*=7.6 Hz, 1H), 6.70-6.64 (m, 2H), 5.10 (s, 1H), 3.80 (q, *J*=7 Hz, 2H), 0.83 (t, *J*=7 Hz, 3H). 13C NMR (δ ppm, 100 MHz, CDCl3):166.0, 160.0, 158.2, 158.2, 145.4, 142.8, 141.9, 137.9, 135.3, 134.7, 134.5, 134.3, 129.8, 129.2, 128.8, 128.6, 126.5, 126.3, 126.1, 125.6, 122.7, 122.6, 122.3, 120.4, 119.1, 118.7, 115.6, 65.2, 62.3, 29.7, 13.6. Elemental Analysis: Analytical calculated (%): C, 57.12; H, 3.05; N, 8.07; Found (%): C, 57.13; H, 3.02; N, 8.05.

**3.11 (R)-12-oxo-2',5'-diphenyl-12H-spiro[indolo[2,1-b]quinazoline-6,3'-pyrazole]-4',4'(2'H)-dicarbonitrile; C31H18N6O (3k):** Yellow powder; Yield: 93%; mp: 298-300 ℃; FTIR (cm-1): 2105, 1676, 1594, 1486, 1456, 1352, 1229, 1095. 1H NMR (δ ppm, 400 MHz, CDCl3):8.80 (d, *J*=7.6 Hz, 1H), 8.71 (d, *J*=8 Hz, 1H), 8.51 (d, *J*=7.6 Hz, 1H), 8.41-8.39 (dd, *J*=0.8 Hz, *J*=8 Hz, 1H), 8.10-8.06 (m, 2H), 8.02-8.00 (dd, *J*=0.6 Hz, *J*=8.4 Hz, 1H), 7.86-7.83 (m, 1H), 7.79-7.74 (m, 3H), 7.69-7.65 (m, 1H), 7.59-7.55 (m, 2H), 7.08 (t, *J*=8 Hz, 2H), 6.95-6.85 (m, 2H). 13C NMR (δ ppm, 100 MHz, CDCl3):162.9, 159.3, 158.9, 146.2, 145.8, 142.0, 141.4, 134.9, 133.5, 133.0, 129.8, 129.1, 128.5, 128.4, 127.1, 126.6, 126.4, 126.1, 124.5, 122.0, 119.8, 118.6, 118.0, 116.8, 116.5, 116.2, 109.9, 109.4, 68.9, 53.2. Elemental Analysis: Analytical calculated (%): C, 75.91; H, 3.70; N, 17.13; Found (%): C, 75.93; H, 3.71; N, 17.10

**3.12 Ethyl-1'-methyl-2,12''-dioxo-12''*H*-dispiro[indoline-3,2'-pyrrolidine-3',6''- indolo[2,1-*b*]quinazoline]-4'-carboxylate; C29H24N4O4 (6a):** Yellow solid; Yield: 85%; mp: 250-252 ℃; FTIR (cm-1): 1722, 1705, 1695, 1514, 750. 1H NMR (δ ppm, 400 MHz, CDCl3):10.46 (s, 1H), 8.32-8.27 (m, 2H), 8.19 (q, *J*=7.8, 1H), 8.00 (s, 1H), 7.58-7.49 (m, 3H), 7.36 (t, *J*=7.4 Hz, 1H), 6.95 (t, *J*=7.7 Hz, 1H), 6.53 (t, *J*=7.6 Hz, 2H), 6.12 (d, *J*=7.5 Hz, 1H), 4.95 (q, *J*=5.8 Hz, 2H), 3.78 (t, *J*=10 Hz, 1H), 3.69-3.61 (m, 1H), 3.50-3.44 (m, 1H), 2.22 (s, 3H), 0.50 (t, *J*=7.1 Hz, 3H). 13C NMR (δ ppm, 100 MHz, CDCl3): 176.4, 169.8, 159.5, 155.6, 146.9, 141.7, 139.2, 134.3, 132.7, 132.2, 130.1, 129.7, 127.9, 127.3, 126.7, 125.8, 122.6, 122.3, 121.1, 119.1, 117.8, 109.8, 78.6, 60.6, 51.6, 49.1, 35.0, 29.7, 13.3. Elemental Analysis: Analytical calculated (%): C, 60.96; H, 4.06; N, 9.80; Found (%): C, 60.94; H, 4.06; N, 9.81.

**3.12 Ethyl-8''-chloro-1'-methyl-2,12''-dioxo-12''*H*-dispiro[indoline-3,2'-pyrrolidine- 3',6''-indolo[2,1-*b*]quinazoline]-4'-carboxylate; C29H23ClN4O4 (6b):** Yellow solid; Yield: 91%; mp: 214-216 ℃; FTIR (cm-1): 1721, 1718,1685, 1575, 690. 1H NMR (δ ppm, 400 MHz, CDCl3):10.89 (s, 1H). 8.32 (d, *J*=8.8 Hz, 1H), 8.23-8.21 (m, 1H), 8.13-8.12 (m, 1H), 7.66-7.65 (m, 1H), 7.59-7.57 (m, 1H), 7.44-7.40 (m, 2H), 7.32-7.30 (m, 1H), 6.57-6.53 (m, 1H), 6.45 (d, *J*=8 Hz, 1H), 6.34 (d, *J*=7.2 Hz, 1H), 4.06 (q, *J*=8.8 Hz, 2H), 2.56-2.54 (m, 1H), 2.30 (t, *J*=7.6 Hz, 2H), 1.96 (s, 3H), 0.68 (t, *J*=6.8 Hz, 3H). 13C NMR (δ ppm, 100 MHz, CDCl3): 175.6, 165.1, 157.2, 140.7, 139.0, 137.2, 135.5, 134.7, 131.7, 130.0, 129.1, 128.4, 128.1, 127.3, 125.0, 121.0, 119.9, 119.7, 118.1, 116.4, 113.2, 110.2, 86.2, 61.5, 52.7, 46.7, 29.7, 22.7, 14.1. Elemental Analysis: Analytical calculated (%): C, 70.72; H, 4.91; N, 11.38; Found (%): C, 70.70; H, 4.92; N, 11.36.

**3.13 Ethyl-8''-bromo-1'-methyl-2,12''-dioxo-12''*H*-dispiro[indoline-3,2'-pyrrolidine- 3',6''-indolo[2,1-*b*]quinazoline]-4'-carboxylate; C29H23BrN4O4 (6c):** Yellow solid; Yield: 88%; mp: 225-227 ℃; FTIR (cm-1): 1724, 1719, 1691, 1595, 1450. ). 1H NMR (δ ppm, 400 MHz, DMSO-*d6*): 10.71 (s, 1H), 8.10 (d, *J*=7.7, 1H), 8.02 (q, *J*=5, 1H), 7.84 (d, *J*=7.8, 1H), 7.79-7.71 (m, 1H), 7.59 (d, *J*=8.2 Hz, 1H), 7.48-7.41 (m, 1H), 7.26-7.19 (m, 1H), 7.14 (d, *J*=8.2 Hz, 1H), 6.96 (dd, *J*=10.4 *J*=2.4 Hz, 1H), 6.45 (d, *J*=2.4Hz, 1H), 6.04- 5.99 (m, 1H), 4.67 (d, *J*=11 Hz, 2H), 4.25 (d, *J*=11.7 Hz, 1H), 4.20- 4.16 (m, 1H), 4.01- 3.94 (m, 1H), 2.99 (s, 3H), 0.85 (t, *J*=6.3 Hz, 3H). 13C NMR (δ ppm, 100 MHz, DMSO-*d6*): 182.0, 171.2, 159.4, 144.0, 141.0, 139.4, 137.6, 135.8, 135.6, 132.9, 129.3, 128.3, 127.9, 125.9, 124.3, 121.2, 120.0, 117.3, 116.2, 116.0, 112.1, 83.0, 67.6, 60.1, 46.2, 33.3, 23.2, 15.1, 9.1. Elemental Analysis: Analytical calculated (%): C, 66.10; H, 4.40; N, 10.63; Found (%): C, 66.10; H, 4.42; N, 10.62.

**3.14 Ethyl-8''-fluoro-1'-methyl-2,12''-dioxo-12''*H*-dispiro[indoline-3,2'-pyrrolidine- 3',6''-indolo[2,1-*b*]quinazoline]-4'-carboxylate;** **C29H23FN4O4 (6d):** Yellow solid; Yield: 80%; mp: 252-254 ℃; FTIR (cm-1): 1723, 1714, 1683, 1584, 720. 1H NMR (δ ppm, 400 MHz, DMSO-*d6*): 10.2 (s, 1H), 8.02 (q, *J*=5.1 Hz, 1H), 7.84 (d, *J*=7.8 Hz, 1H), 7.78-7.71 (m, 3H), 7.59 (d, *J*=8.2 Hz, 1H), 7.48-7.41 (m, 2H), 6.96 (d, *J*=11 Hz, 1H), 6.48-6.42 (m, 1H), 6.04- 5.99 (m, 1H), 4.67 (d, *J*=11.6 Hz, 2H), 4.20- 4.16 (m, 1H), 4.01- 3.94 (m, 2H), 2.92 (s, 3H), 1.13 (t, *J*=7 Hz, 3H). 13C NMR (δ ppm, 100 MHz, DMSO-*d6*): 174.4, 165.3, 156.5, 137.4, 137.2, 136.6, 130.6, 128.8, 128.0, 127.7, 127.2, 124.6, 124.4, 123.3, 121.4, 120.8, 120.2, 120.0, 118.9, 114.2, 112.3, 107.6, 73.3, 62.4, 55.3, 42.5, 29.4, 22.5, 14.4. Elemental Analysis: Analytical calculated (%): C, 68.23; H, 4.54; N, 10.97; Found (%): C, 68.24; H, 4.55; N, 10.96.

**3.15 Ethyl-8''-methoxy-1'-methyl-2,12''-dioxo-12''*H*-dispiro[indoline-3,2'- pyrrolidine-3',6''-indolo[2,1-*b*]quinazoline]-4'-carboxylate; C30H26N4O5 (6e):** Yellow solid; Yield: 74%; mp: 260-262 ℃; FTIR (cm-1): 1725, 1718, 1690, 1591, 735. 1H NMR (δ ppm, 400 MHz, DMSO-*d6*): 11.67 (s, 1H), 8.49 (d, *J*=7.6 Hz, 2H), 8.33 (d, *J*=8 Hz, 2H), 7.96 (d, *J*=3.6 Hz, 2H), 7.90-7.86 (m, 2H), 7.73-7.77 (m, 1H), 7.49 (t, *J*=7.6 Hz, 2H), 4.34 (q, *J*=3.6 Hz, 2H), 3.73 (s. 3H), 2.68-2.66 (m, 1H), 2.33-2.32 (m, 2H), 1.97 (s, 3H), 0.69 (t, *J*=9.2 Hz, 3H). 13C NMR (δ ppm, 100 MHz, DMSO-*d6*): 181.8, 170.8, 158.1, 146.8, 145.4, 144.9, 137.3, 135.9, 135.8, 131.6, 130.5, 130.4, 127.4, 124.7, 124.4, 123.6, 121.4, 119.6, 119.0, 114.6, 110.7, 82.7, 60.8, 56.4, 46.3, 32.2, 25.7, 21.5, 12.8. Elemental Analysis: Analytical calculated (%): C, 68.95; H, 5.02; N, 10.72; Found (%): C, 68.94; H, 5.01; N, 10.73.

**3.16 Ethyl-2''-chloro-1'-methyl-2,12''-dioxo-12''*H*-dispiro[indoline-3,2'-pyrrolidine- 3',6''-indolo[2,1-*b*]quinazoline]-4'-carboxylate; C29H23ClN4O4 (6f):** Yellow solid; Yield: 71%; mp: 243-245 ℃; FTIR (cm-1): 1720, 1715, 1697, 1514, 819. 1H NMR (δ ppm, 400 MHz, CDCl3):10.33 (s, 1H), 8.56 (d, *J*=8 Hz, 1H), 8.39- 8.36 (m, 1H), 7.97 (d, *J*=8 Hz, 1H), 7.85 (d, *J*=7.6 Hz, 1H), 7.81-7.76 (m, 2H), 7.74-7.70 (m, 1H), 7.63-7.59 (m, 1H), 7.47- 7.38 (m, 1H), 7.36 (t, *J*=7.6 Hz, 1H), 7.07-7.04 (m, 1H), 3.91 (q, *J*=3.6 Hz, 2H), 2.90 (t, *J*=10.4 Hz, 1H), 2.72 (d, *J*=7.6 Hz, 1H), 2.27 (t, *J*=7.6 Hz, 1H), 1.96 (s, 3H), 0.48 (t, *J*=7.2 Hz, 3H). 13C NMR (δ ppm, 100 MHz, CDCl3): 177.0, 169.4, 152.8, 142.5, 134.3, 133.1, 131.8, 130.0, 129.2, 128.2, 127.2, 126.5, 124.9, 123.3, 121.8, 116.7, 114.8, 112.8, 111.2, 110.0, 72.4, 65.3, 52.9, 42.2, 29.7, 20.5, 11.5. Elemental Analysis: Analytical calculated (%): C, 66.10; H, 4.40; N, 10.63; Found (%): C, 66.11; H, 4.40; N, 10.62.

**3.17 Ethyl-2''-bromo-1'-methyl-2,12''-dioxo-12''*H*-dispiro[indoline-3,2'-pyrrolidine- 3',6''-indolo[2,1-*b*]quinazoline]-4'-carboxylate; C29H23BrN4O4 (6g):** Yellow solid; Yield: 73%; mp: 236-238 ℃; FTIR (cm-1): 1722, 1714, 1685, 1592, 724. 1H NMR (δ ppm, 400 MHz, CDCl3):9.99 (s, 1H), 8.33-8.27 (m, 2H), 8.19 (d, *J*=6.6 Hz, 1H), 8.00 (d, *J*=5.5 Hz, 1H), 7.59- 7.56 (m, 2H), 7.53-7.49 (m, 1H), 7.38-7.34 (m, 1H), 6.97-6.9 (m, 1H), 6.52 (t, *J*=8.3 Hz, 2H), 4.96 (q, *J*=12.5 Hz, 2H), 4.01- 3.94 (m, 1H), 3.78 (t, *J*=10.2 Hz, 1H), 3.69- 3.62 (m, 1H), 2.25 (s, 3H), 0.63 (t, *J*=7.1 Hz, 3H). 13C NMR (δ ppm, 100 MHz, CDCl3): 182.5, 170.3, 158.1, 146.6, 146.3, 144.3, 138.2, 135.1, 133.0, 131.9, 130.7, 130.3, 130.2, 127.5, 127.2, 125.4, 124.1, 123.7, 121.9, 118.0, 101.9, 72.6, 62.7, 44.1, 31.9, 29.6, 22.6, 14.1. Elemental Analysis: Analytical calculated (%): C, 60.96; H, 4.06; N, 9.80; Found (%): C, 60.96; H, 4.05; N, 9.81.

**3.18 Ethyl-2''-bromo-8''-chloro-1'-methyl-2,12''-dioxo-12''*H*-dispiro[indoline-3,2'- pyrrolidine-3',6''-indolo[2,1-*b*]quinazoline]-4'-carboxylate; C29H22BrClN4O4 (6h):** Yellow solid; Yield: 70%; mp: 248-250 ℃; FTIR (cm-1): 1721, 1717, 1682, 1595, 1414. 1H NMR (δ ppm, 400 MHz, CDCl3): 10.34 (s, 1H), 8.45 (d, *J*=8.8 Hz, 1H), 8.32 (d, *J*=2.4 Hz, 1H), 7.96 (d, *J*=2.2 Hz, 1H), 7.85-7.82 (m, 1H), 7.75- 7.72 (m, 1H), 7.46 (d, *J*=9.2 Hz, 2H), 7.28 (t, *J*=2.4 Hz, 1H), 7.07-7.04 (m, 2H), 3.91 (q, *J*=2.4 Hz, 2H), 2.75-2.71 (m, 1H), 2.55-2.51 (m, 1H), 2.10 (t, *J*=4 Hz, 1H), 1.96 (s, 3H), 0.80 (t, *J*=6.4 Hz, 3H). 13C NMR (δ ppm, 100 MHz, CDCl3): 182.5, 169.4, 158.1, 147.5, 146.6, 146.3, 144.3, 138.3, 135.1, 130.7, 130.2, 127.5, 127.2, 125.4, 123.7, 121.9, 117.9, 107.0, 106.0, 104.1, 101.9, 81.4, 60.5, 46.9, 41.8, 29.7, 22.7, 14.1. Elemental Analysis: Analytical calculated (%): C, 57.49; H, 3.66; N, 9.25; Found (%): C, 57.49; H, 3.65; N, 9.26.

**3.19 Ethyl-8''-bromo-2,12''-dioxo-5',6',7',7a'-tetrahydro-1'*H*,12''*H*-dispiro[indoline- 3,3'-pyrrolizine-2',6''-indolo[2,1-*b*]quinazoline]-1'-carboxylate; C31H25BrN4O4 (6i):** Yellow solid; Yeild: 80%; mp: 225-227 ℃; FTIR (cm-1): 1720, 1713, 1681. 1592. 1418. 1H NMR (δ ppm, 400 MHz, CDCl3): 9.08 (s, 1H), 8.60- 8.53 (m, 2H), 8.47 (d, *J*=8.4 Hz, 1H), 8.41 (d, *J*=8 Hz, 1H), 8.35 (t, *J*=5.6 Hz, 2H), 7.74- 7.73 (m, 2H), 7.68-7.45 (m, 1H), 7.39 (t, *J*=4 Hz, 2H), 3.69 (q, *J*=7.6 Hz, 2H), 2.75-2.71 (m, 1H), 2.55-2.51 (m, 1H), 2.28 (t, *J*=7.2 Hz, 3H), 1.37-1.33 (m, 2H), 1.31-1.30 (m, 1H), 0.69 (t, *J*=8 Hz, 3H). 13C NMR (δ ppm, 100 MHz, CDCl3): 177.0, 170.0, 158.3, 145.7, 141.7, 139.9, 137.1, 130.0, 129.8, 129.3, 129.2, 126.9, 126.2, 126.0, 122.8, 122.6, 122.2, 120.8, 116.6, 109.7, 78.8, 61.8, 60.5, 51.7, 49.2, 35.0, 29.7, 22.7, 13.2. Elemental Analysis: Analytical calculated (%): C, 62.32; H, 4.22; N, 9.38; Found (%): C, 62.33; H, 4.23; N, 9.36.

**3.20 Ethyl-8''-bromo-2,12''-dioxo-7',7a'-dihydro-1'*H*,3'*H*,12''*H*-dispiro[indoline- 3,5'-pyrrolo[1,2-*c*]thiazole-6',6''-indolo[2,1-*b*]quinazoline]-7'-carboxylate; C30H23BrN4O4S (6j):**

Yellow solid; Yield: 89%; mp: 249-251 ℃; FTIR (cm-1): 1721, 1719, 1687, 1538, 1425, 918. 1H NMR (δ ppm, 400 MHz, CDCl3): 9.85 (s, 1H), 8.32 (d, *J*=8.8 Hz, 1H), 8.23-8.21 (m, 1H), 8.13-8.12 (m, 1H), 7.81-7.65 (m, 2H), 7.59-7.57 (m, 2H), 6.96-6.92 (m, 1H), 6.57-6.53 (m, 1H), 6.45 (d, *J*=7.6 Hz, 1H), 6.34 (d, *J*=7.6 Hz, 1H), 4.72 (q, *J*=6 Hz, 2H), 3.89 (d, *J*=8 Hz, 1H), 3.74-3.67 (m, 1H), 3.62 (d, *J*=8Hz, 1H), 3.56-3.52 (m, 2H), 3.23 (q, *J*=4 Hz, 2H), 0.58 (t, *J*=10.8 Hz, 3H). 13C NMR (δ ppm, 100 MHz, CDCl3): 177.3, 168.8, 159.4, 154.1, 146.7, 140.8, 139.2, 134.5, 133.1, 131.2, 130.3, 129.3, 127.9, 127.5, 126.7, 125.9, 123.5, 122.5, 121.1, 119.3, 118.1, 109.9, 79.4, 69.0, 66.4, 60.9, 51.2, 36.3, 29.7, 13.4. Elemental Analysis: Analytical calculated (%): C, 58.54; H, 3.77; N, 9.10; Found (%): C, 58.54; H, 3.76; N, 9.10.

**3.21 (3R,3'S)-1'-methyl-2,12''-dioxo-12''H-dispiro[indoline-3,2'-pyrrolidine-3',6''-indolo[2,1-b]quinazoline]-4',4'-dicarbonitrile; C28H18N6O2 (6k):** Yellow solid: Yield: 90%; mp: 260-262 ℃; FTIR (cm-1): 2149,1680, 1546, 1456, 765. 1H NMR (δ ppm, 400 MHz, DMSO-*d6*):11.05 (s, 1H), 8.43 (d, *J*=7.6 Hz, 1H), 8.30-8.28 (dd, *J*=1.2 Hz, *J*=8 Hz, 1H), 7.91-7.86 (m, 1H), 7.82 (d, *J*=7.2 Hz, 1H), 7.62-7.58 (m, 2H), 7.52-7.48 (m, 1H), 7.45-7.41 (m, 1H), 7.28-7.23 (m, 1H), 7.18-7.13 (m, 1H), 6.86 (s, 2H), 3.89 (d, *J*=10 Hz, 1H). 3.64 (d, *J*=10 Hz, 1H). 2.86 (s, 3H). 13C NMR (δ ppm, 100 MHz, DMSO-*d6*): 164.4, 163.8, 159.5, 147.8, 138.6, 137.8, 136.2, 135.1, 129.3, 128.6, 127.8, 127.5, 126.8, 125.7, 124.6, 121.4, 121.3, 116.4, 64.2, 56.0, 55.5, 33.5, 21.5. Elemental Analysis: Analytical calculated (%): C, 71.48; H, 3.86; N, 17.86; Found (%): C, 71.44; H, 3.83; N, 17.85.

**4. Spectra**

**
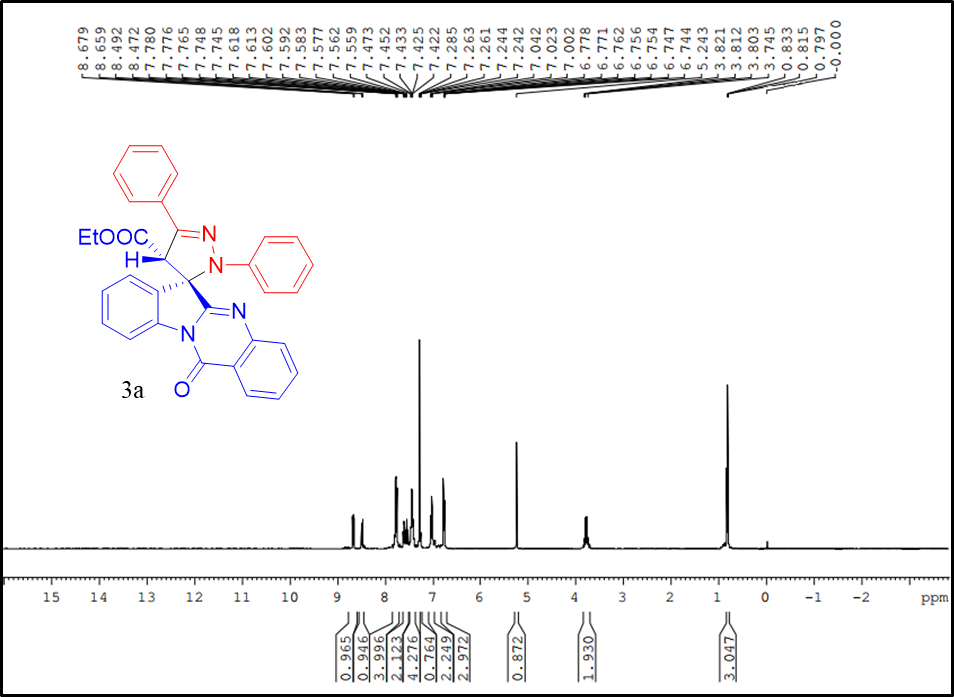
**

**Figure S1**: 1H NMR of compound **3a** (400MHz, CDCl3)

**
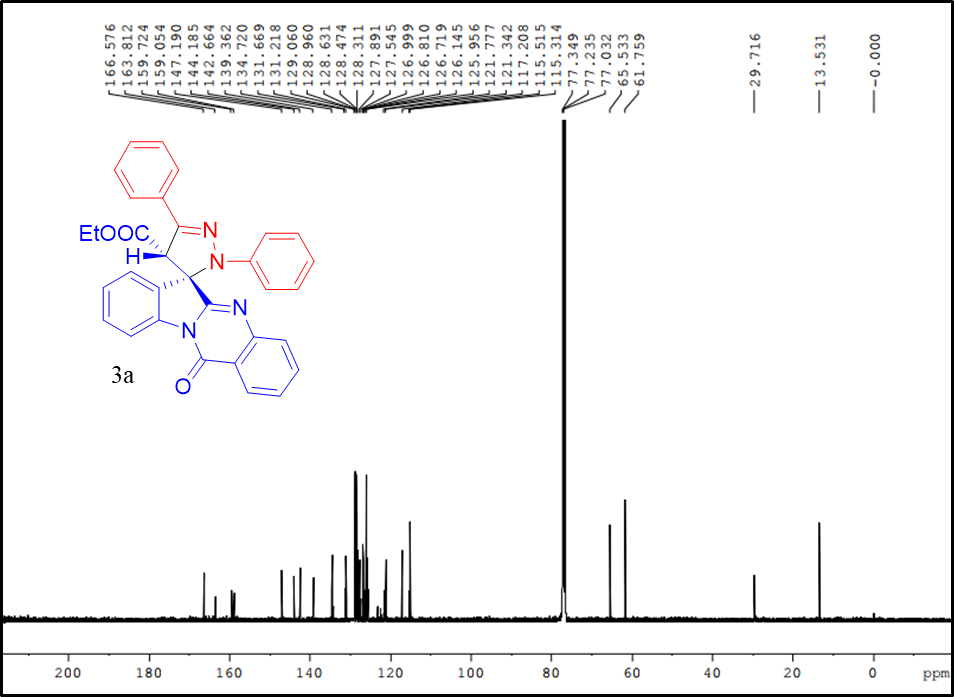
**

**Figure S2**: 13C NMR of compound **3a** (100 MHz, CDCl3)


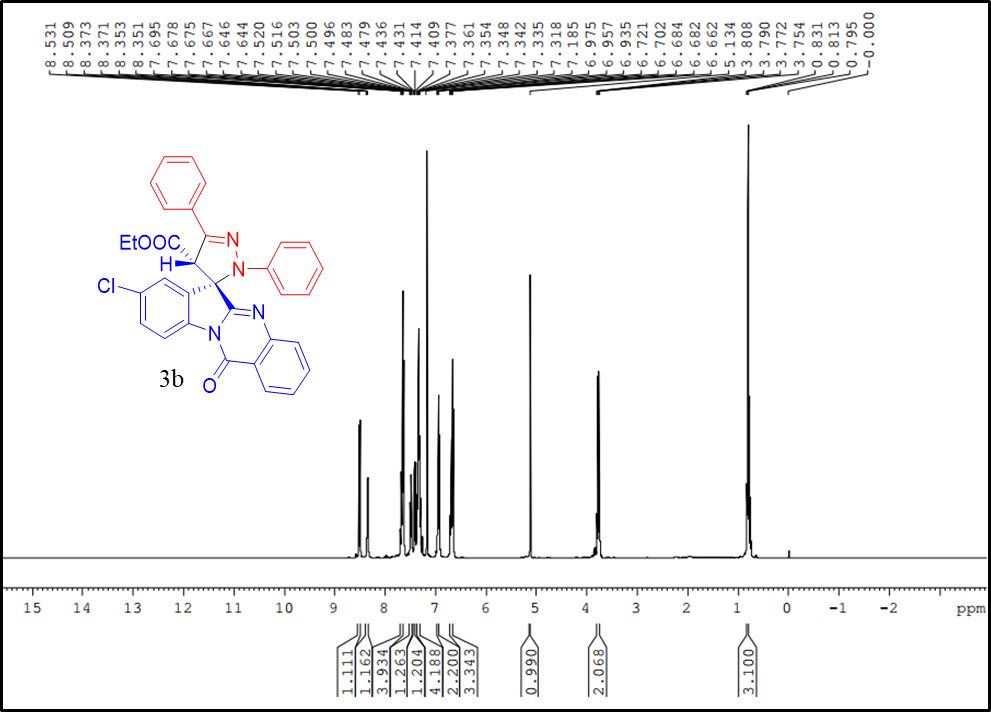


**Figure S3**: 1H NMR of compound **3b** (400 MHz, CDCl3)

**
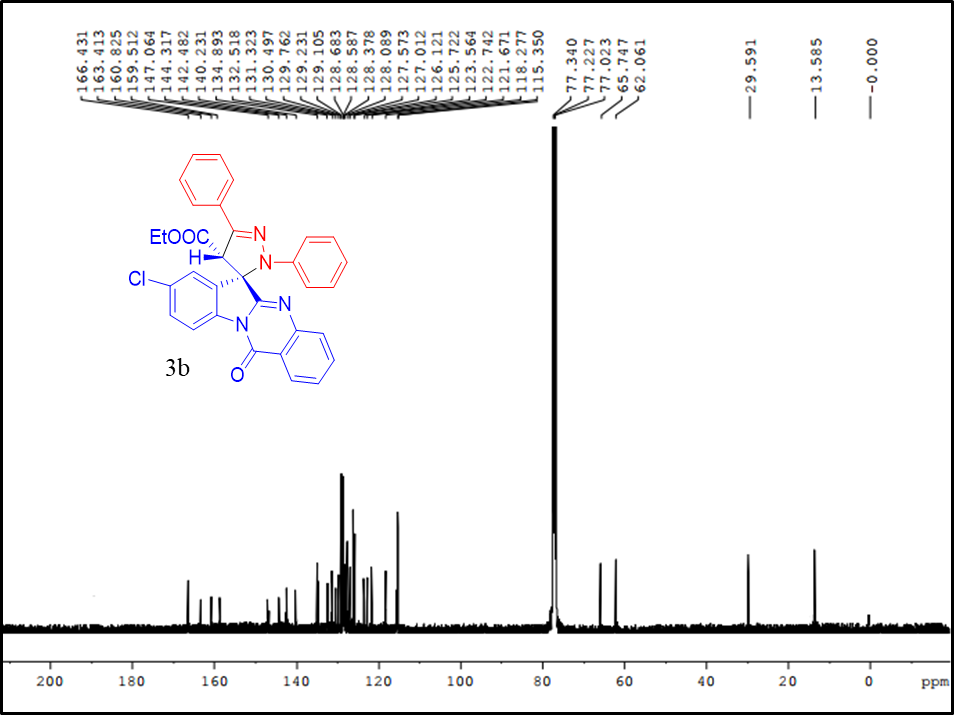
**

**Figure S4**: 13C NMR of compound **3b** (100 MHz, CDCl3)


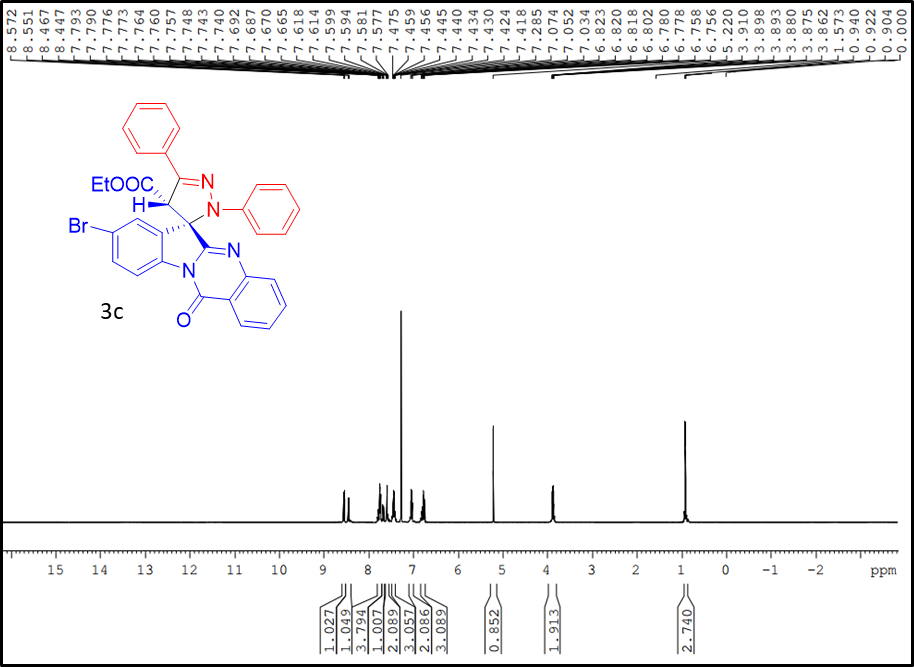


**Figure S5**: 1H NMR of compound **3c** (400 MHz, CDCl3)


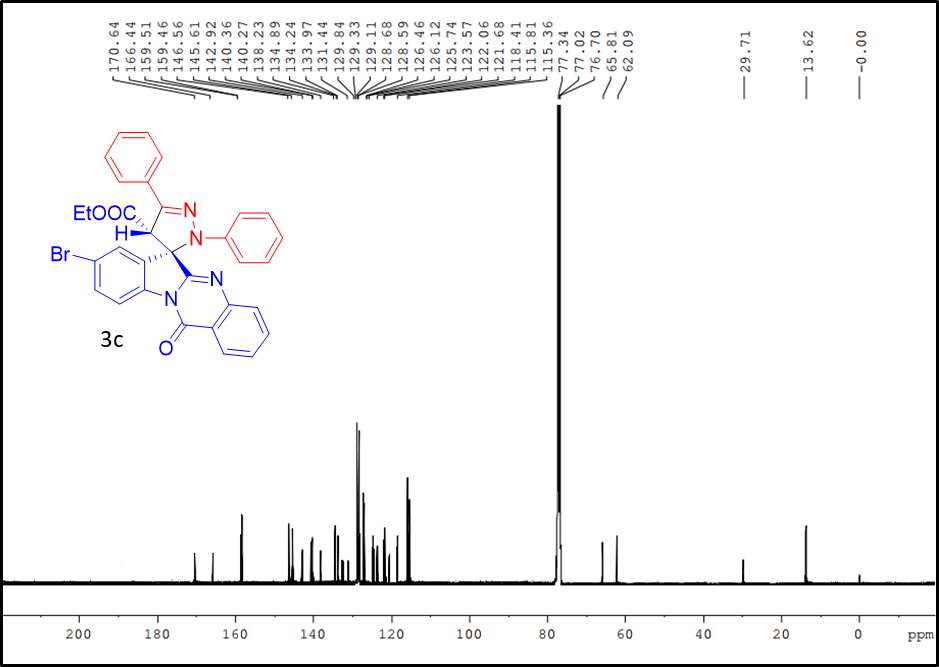


**Figure S6**: 13C NMR of compound **3c** (100 MHz, CDCl3)


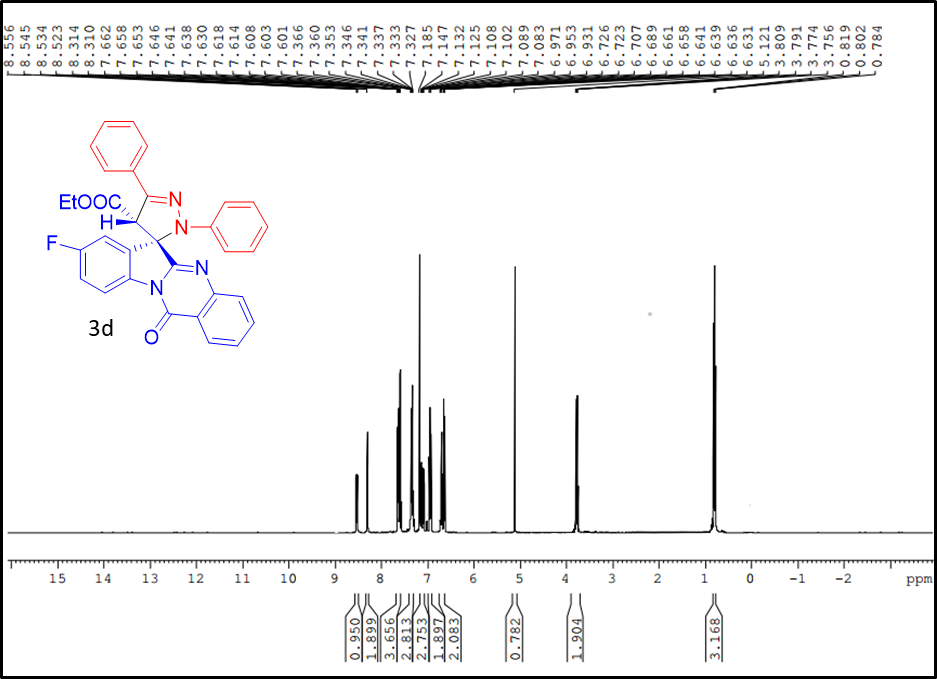


**Figure S7**: 1H NMR of compound **3d** (400 MHz, CDCl3)

**
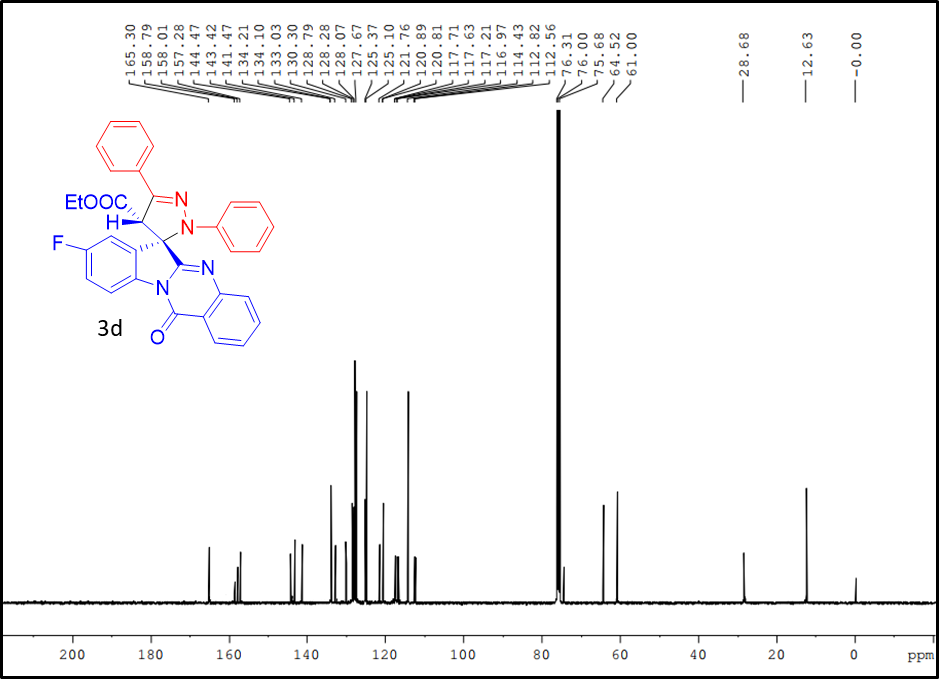
**

**Figure S8**: 13C NMR of compound **3d** (100 MHz, CDCl3)


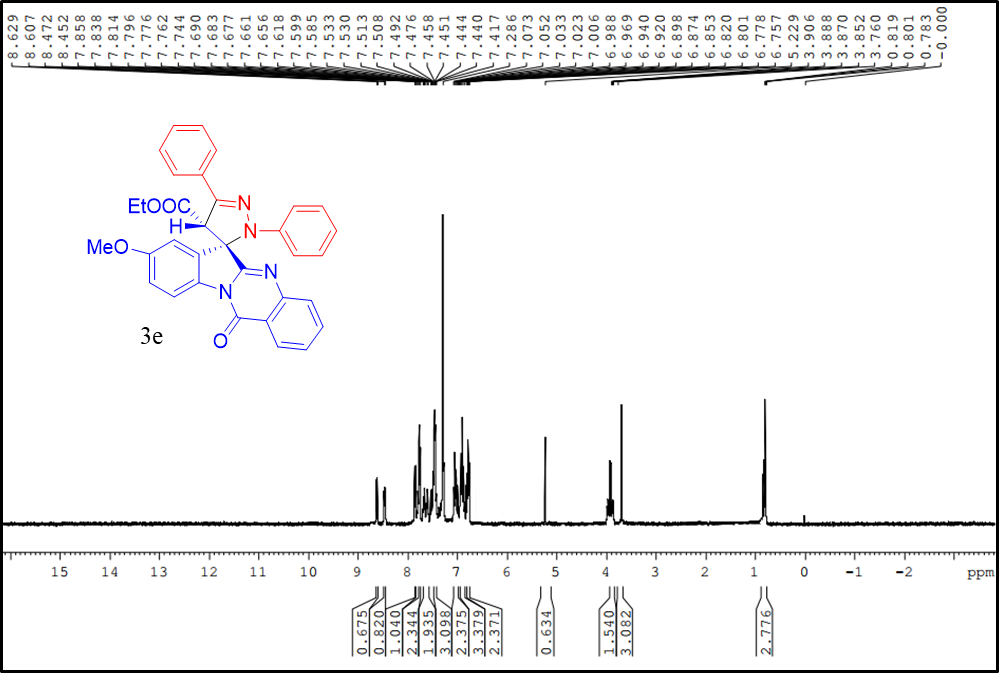


**Figure S9**: 1H NMR of compound **3e** (400 MHz, CDCl3)


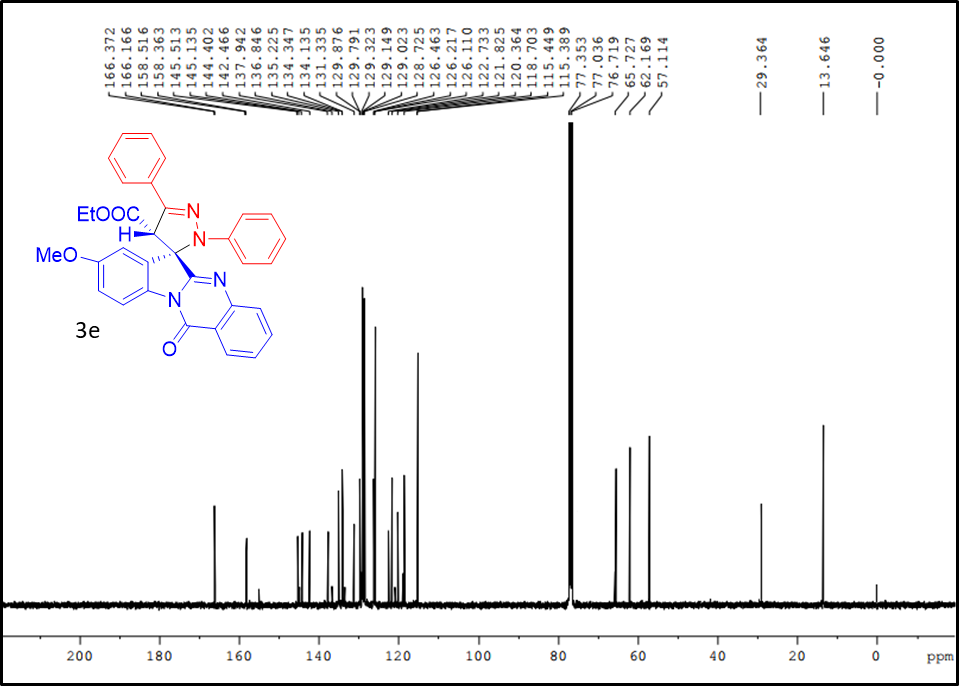


**Figure S10**: 13C NMR of compound **3e** (100 MHz, CDCl3)


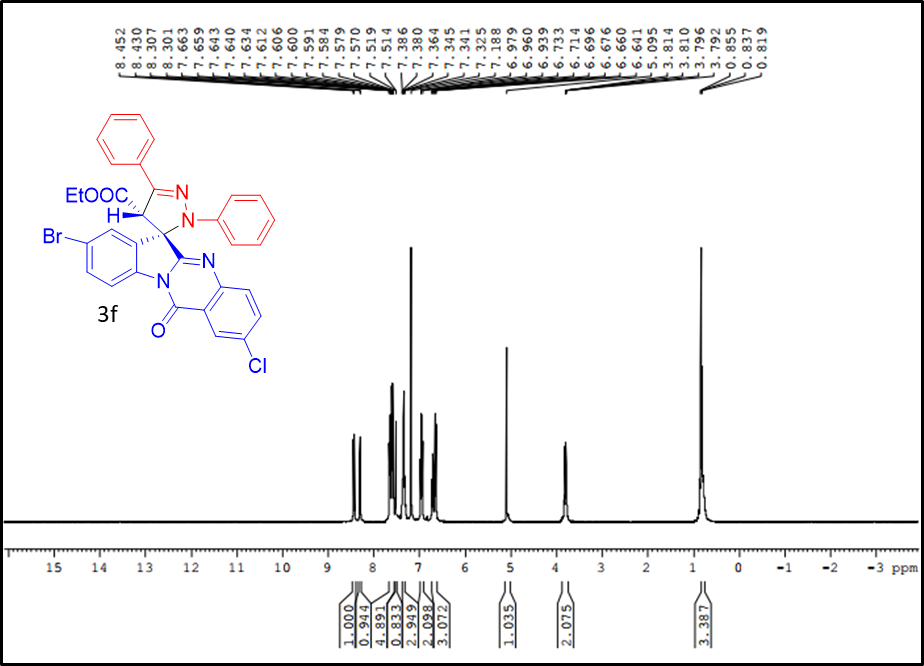


**Figure S11**: 1H NMR of compound **3f** (400 MHz, CDCl3)

**
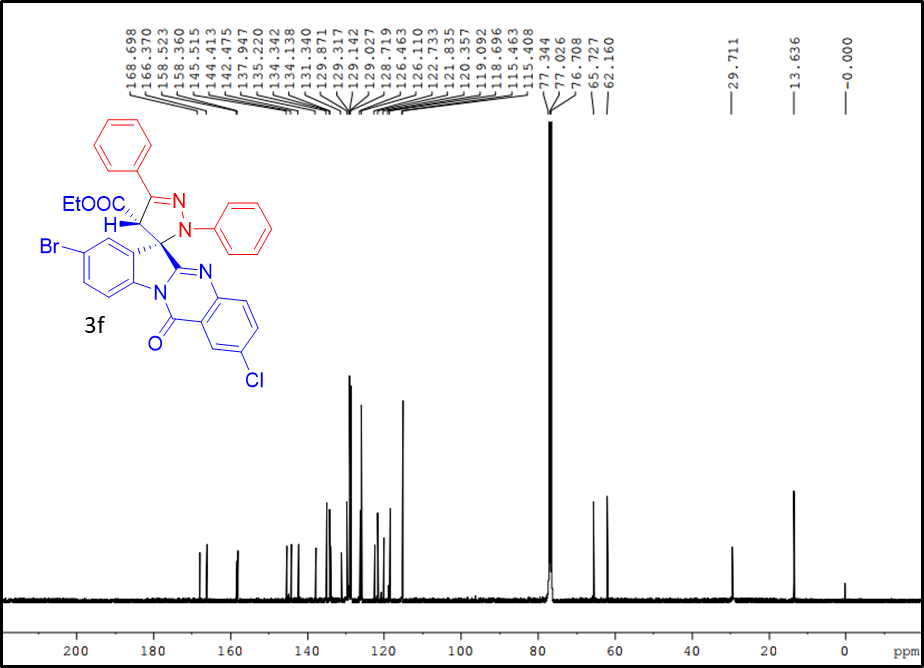
**

**Figure S12**: 13C NMR of compound **3f** (100 MHz, CDCl3)


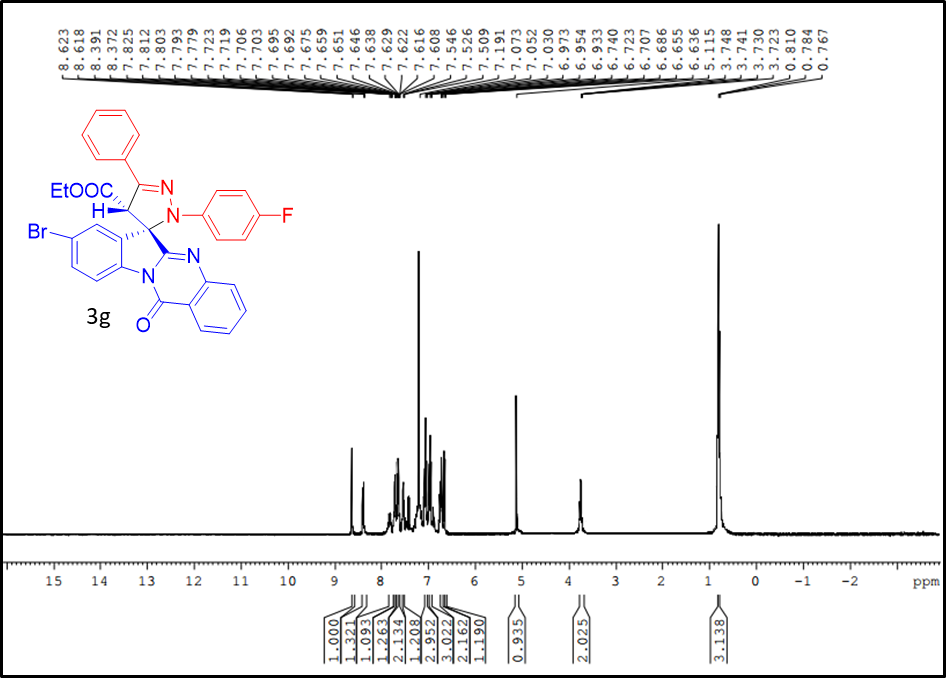


**Figure S13**: 1H NMR of compound **3g** (400 MHz, CDCl3)

**
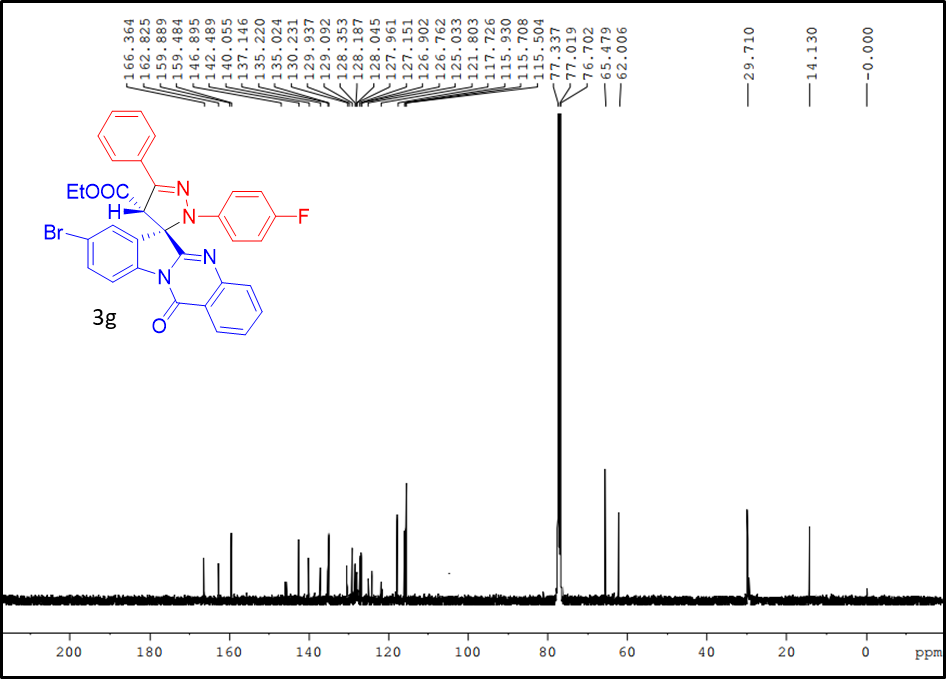
**

**Figure S14**: 13C NMR of compound **3g** (100 MHz, CDCl3)


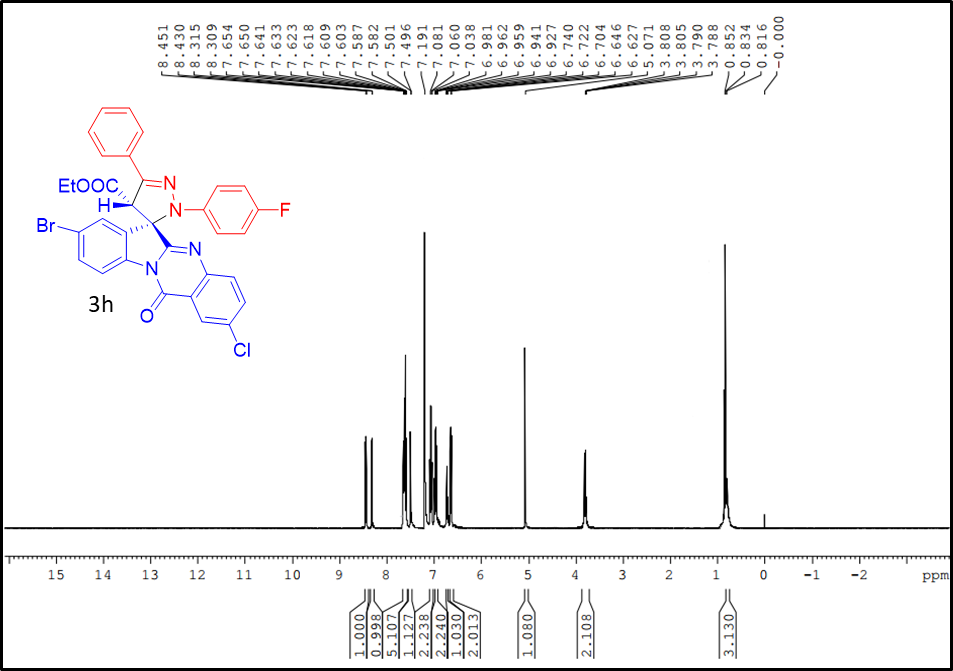


**Figure S15**: 1H NMR of compound **3h** (400 MHz, CDCl3)

**
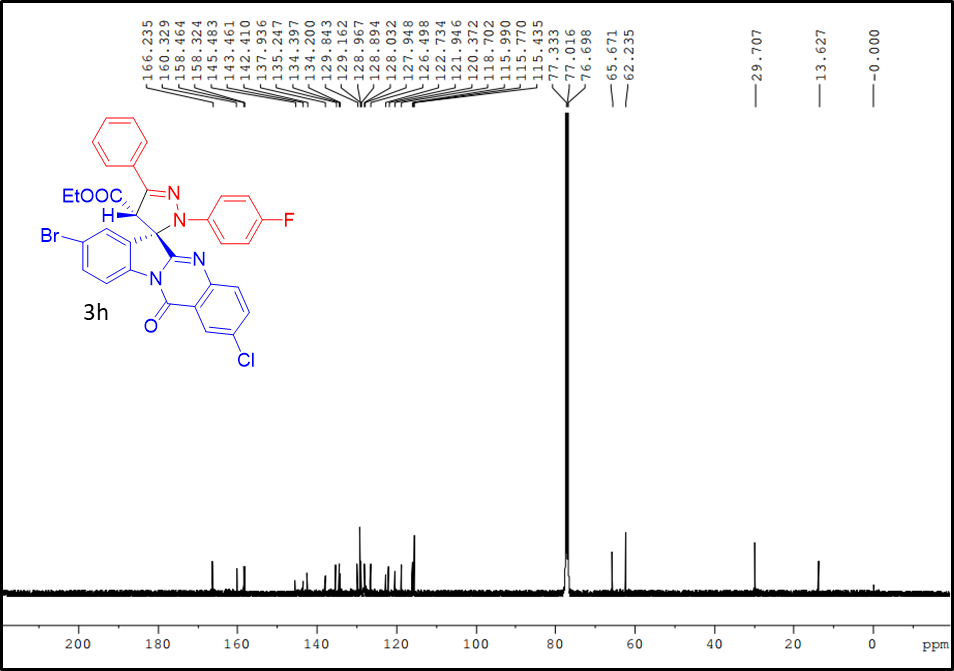
**

**Figure S16**: 13C NMR of compound **3h** (100 MHz, CDCl3)


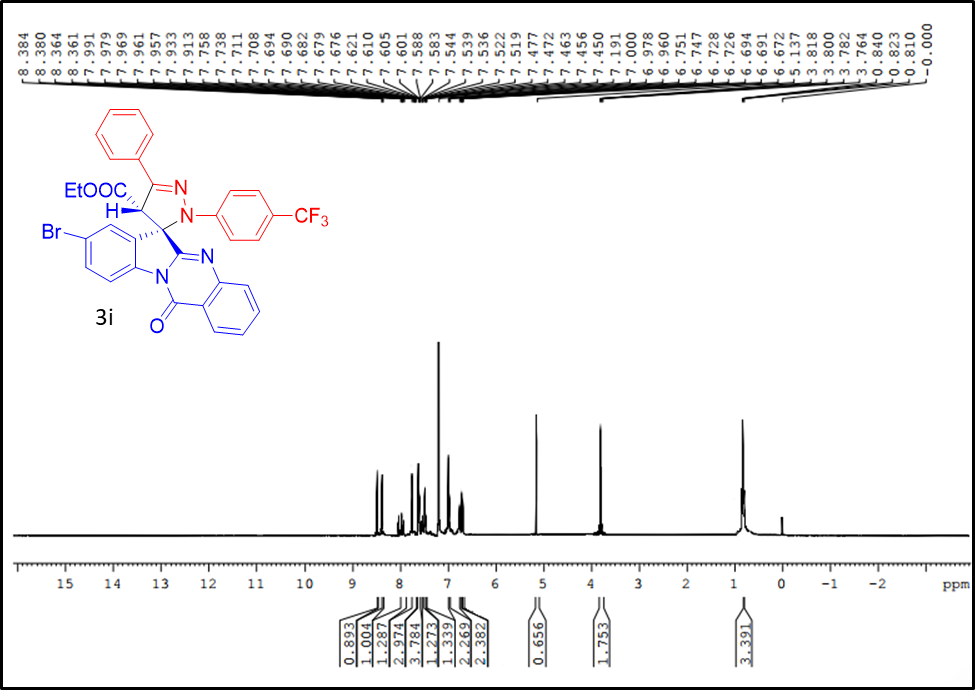


**Figure S17**: 1H NMR of compound **3i** (400 MHz, CDCl3)

**
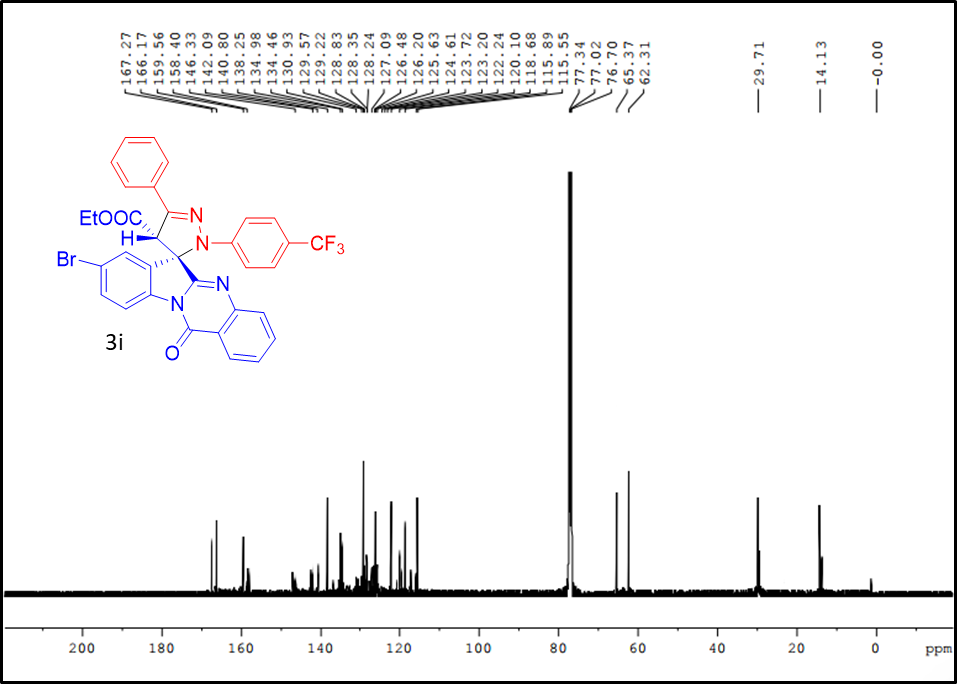
**

**Figure S18**: 13C NMR of compound **3i** (100 MHz, CDCl3)


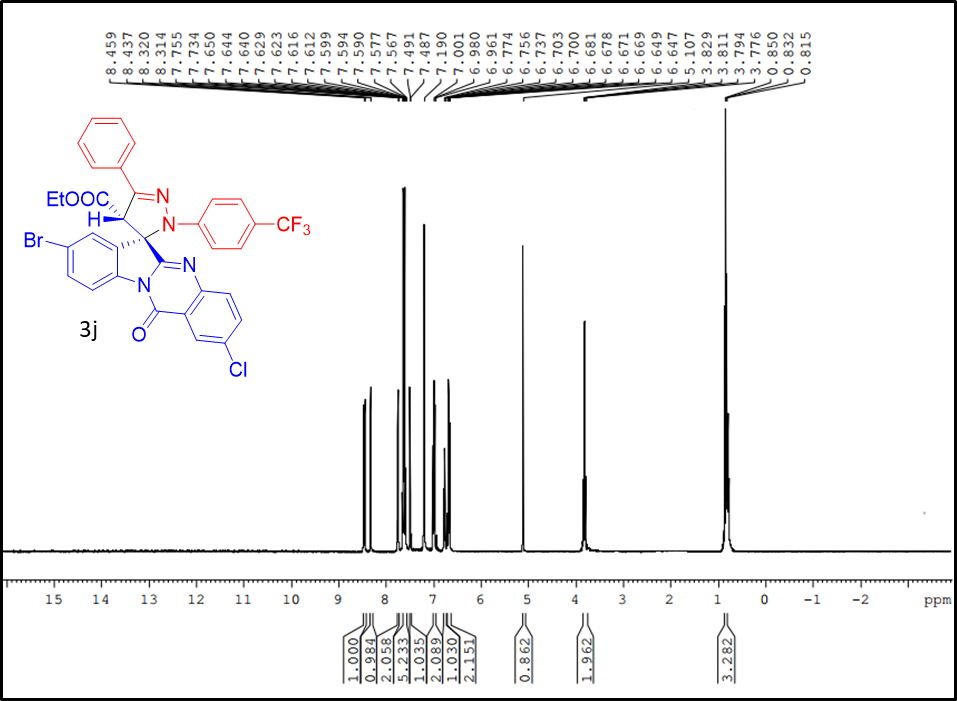


**Figure S19**: 1H NMR of compound **3j** (400 MHz, CDCl3)

**
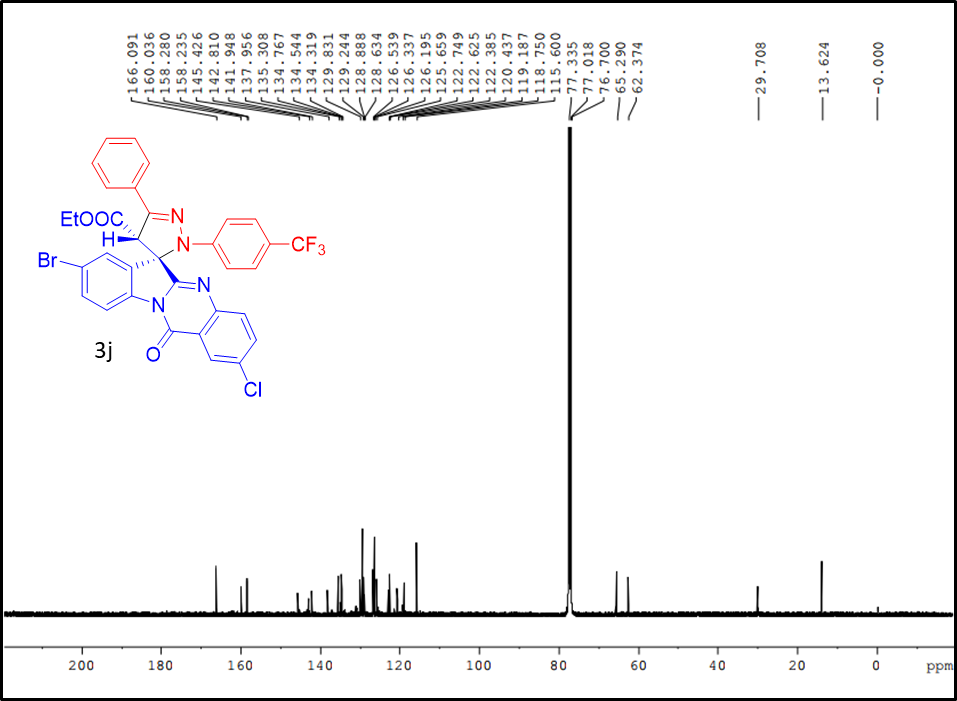
**

**Figure S20**: 13C NMR of compound **3j** (100 MHz, CDCl3)


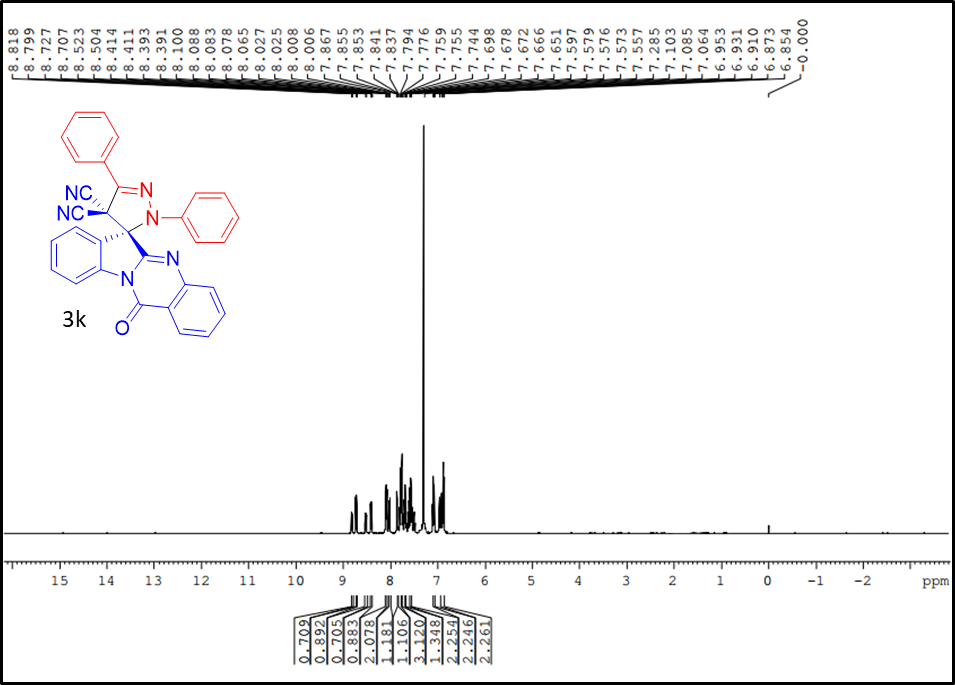


**Figure S21**: 1H NMR of compound **3k** (400 MHz, CDCl3)

**
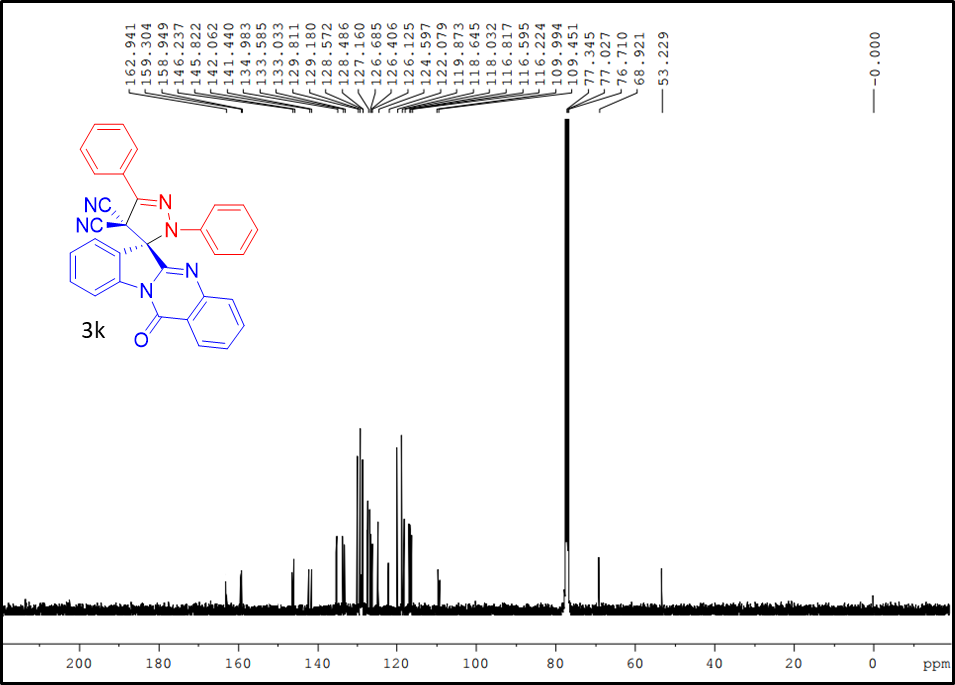
**

**Figure S22**: 13C NMR of compound **3k** (100 MHz, CDCl3)


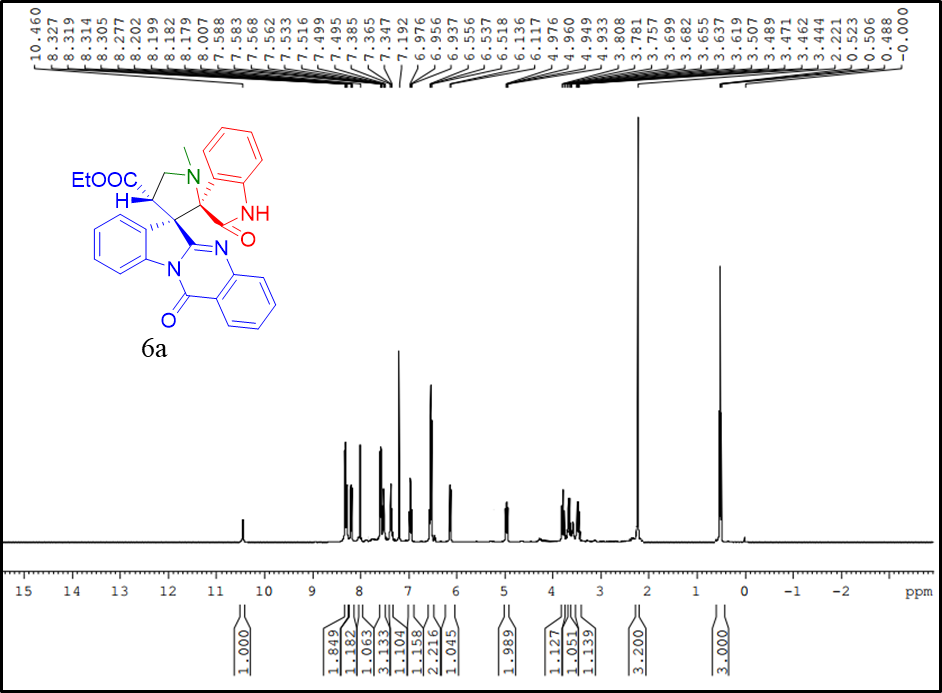


**Figure S23**: 1H NMR of compound **6a** (400 MHz, CDCl3)

**
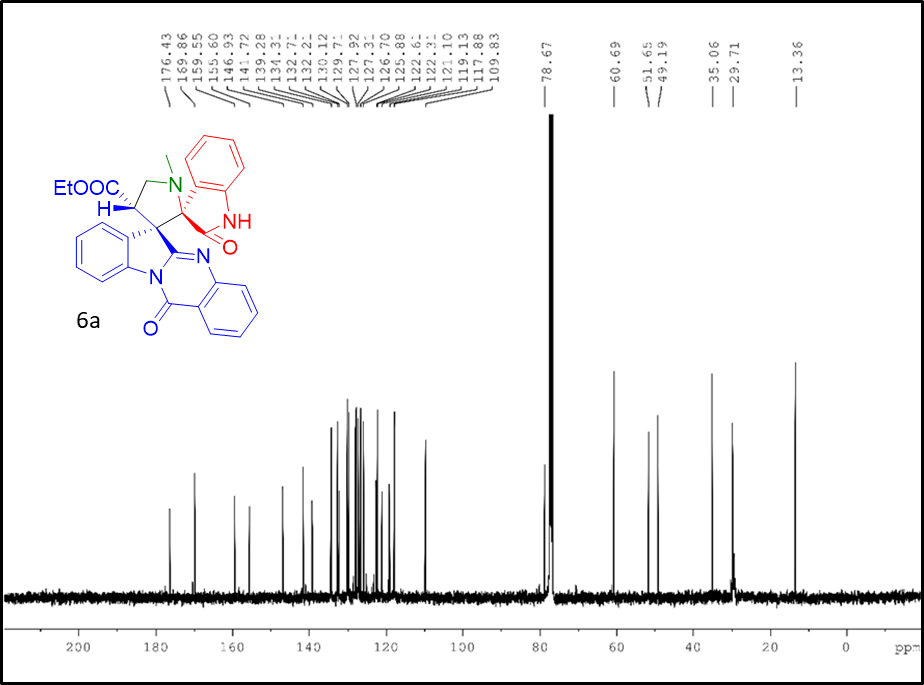
**

**Figure S24**: 13C NMR of compound **6a** (100 MHz, CDCl3)


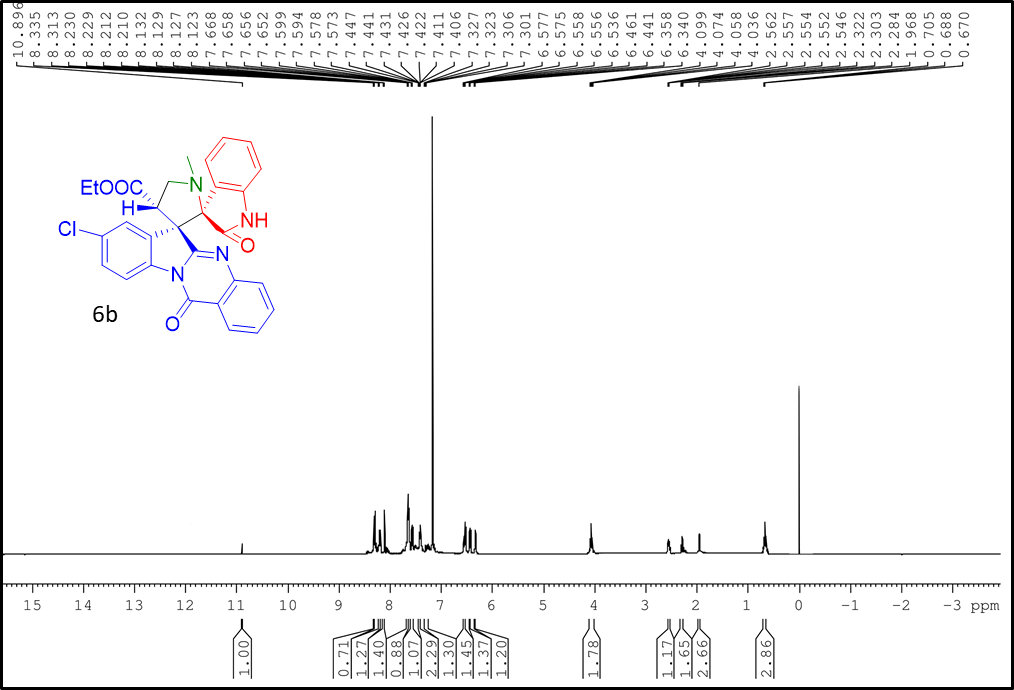


**Figure S25**: 1H NMR of compound **6b** (400 MHz, CDCl3)

**
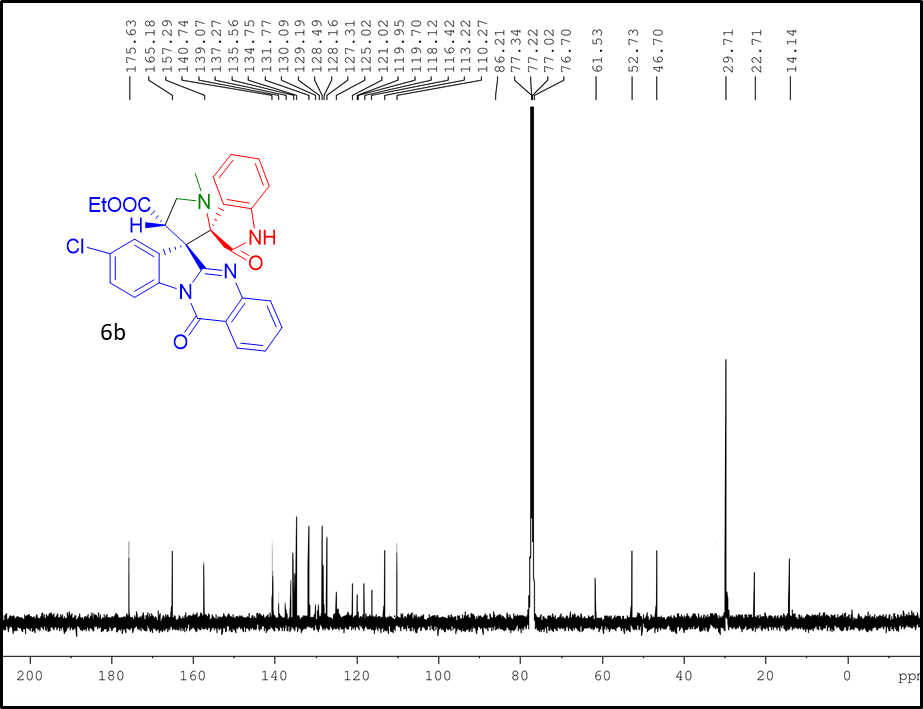
**

**Figure S26**: 13C NMR of compound **6b** (100 MHz, CDCl3)


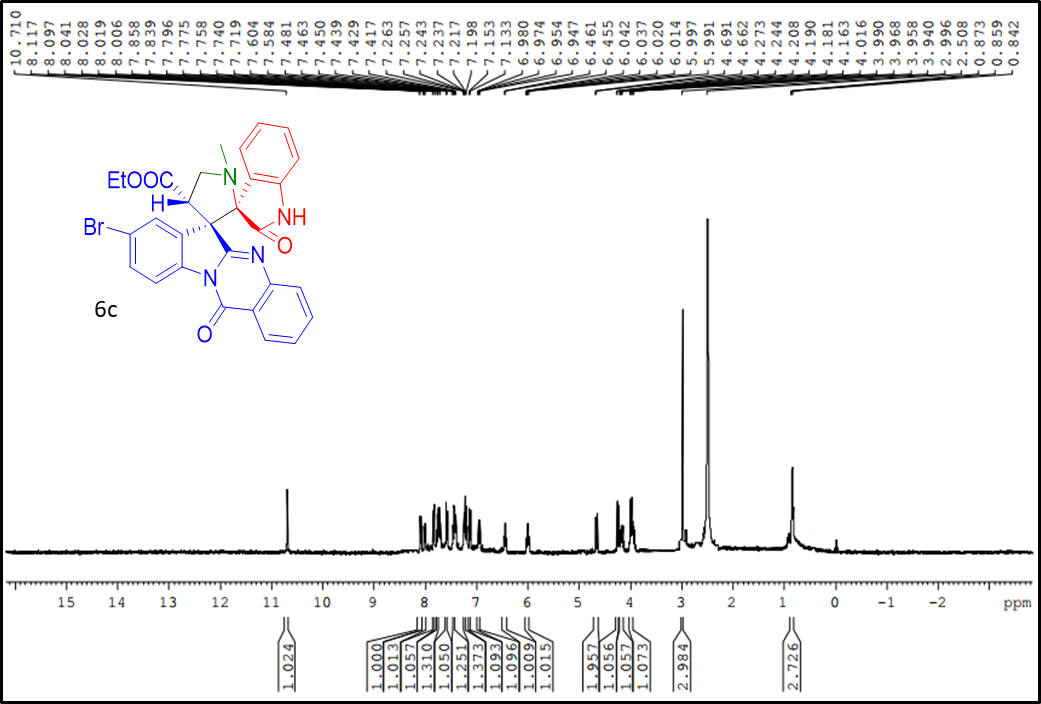


**Figure S27**: 1H NMR of compound **6c** (400 MHz, DMSO-*d6*)

**
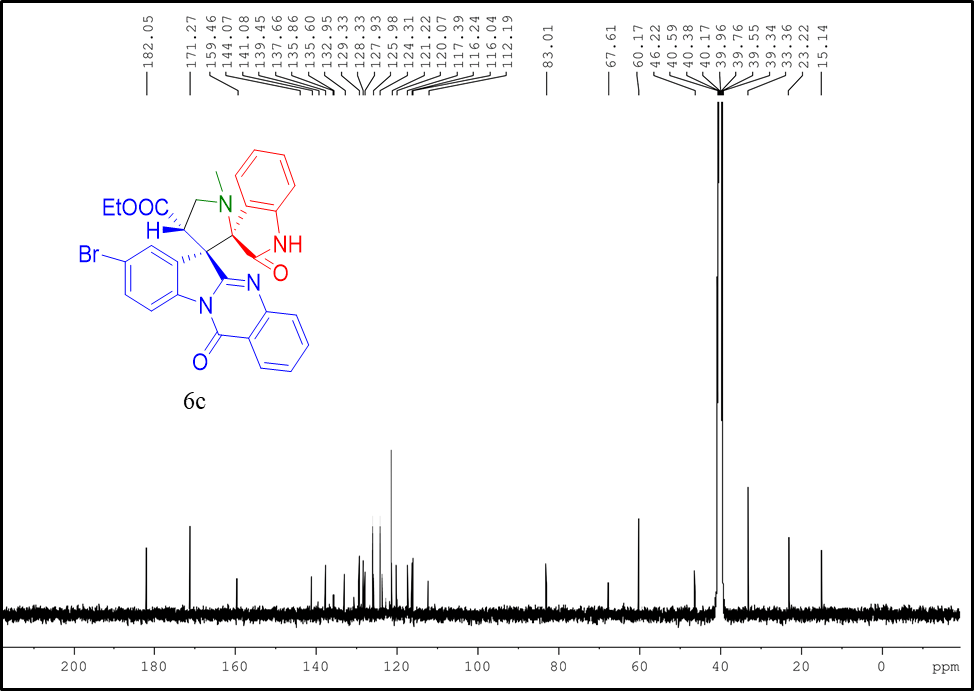
**

**Figure S28**: 13C NMR of compound **6c** (100 MHz, DMSO-*d6*)


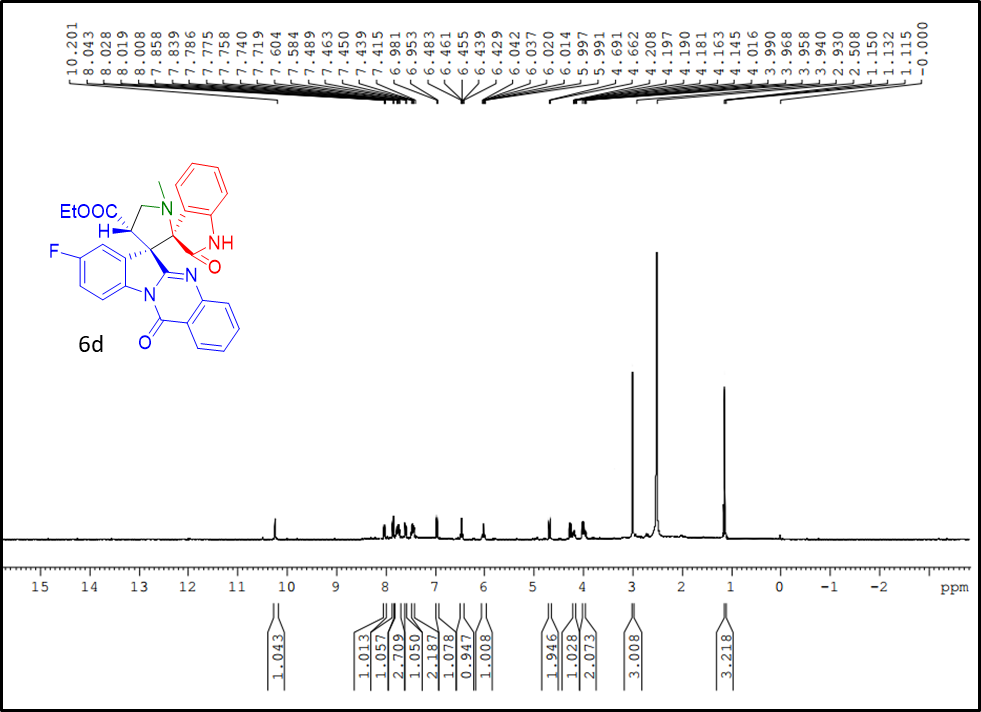


**Figure S29**: 1H NMR of compound **6d** (400 MHz, DMSO-*d6*)

**
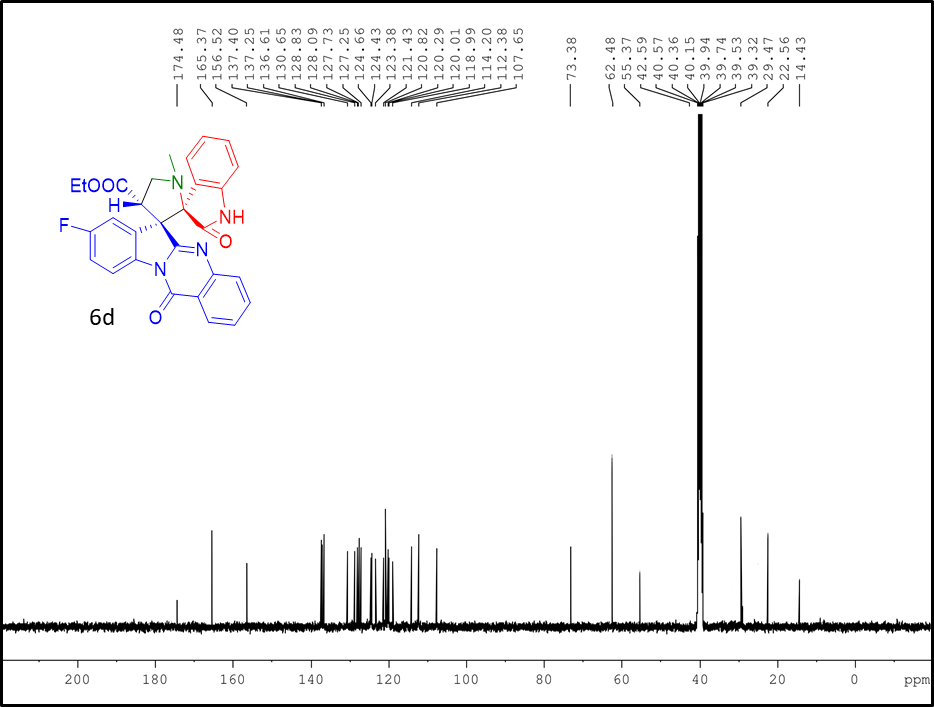
**

**Figure S30**: 13C NMR of compound **6d** (100 MHz, DMSO-*d6*)


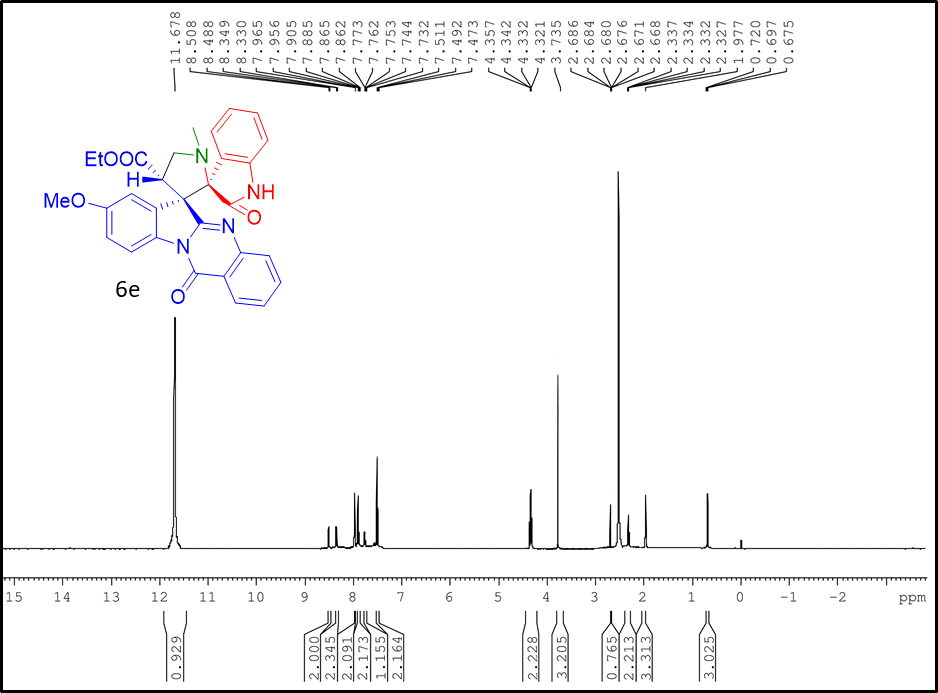


**Figure S31**: 1H NMR of compound **6e** (400 MHz, DMSO-*d6*)

**
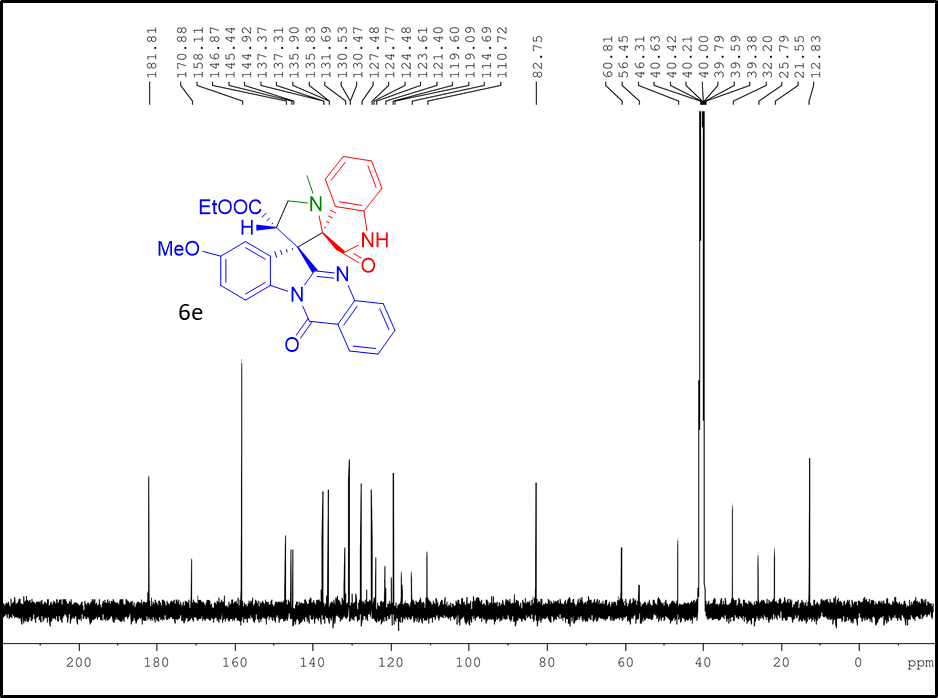
**

**Figure S32**: 13C NMR of compound **6e** (100 MHz, DMSO-*d6*)


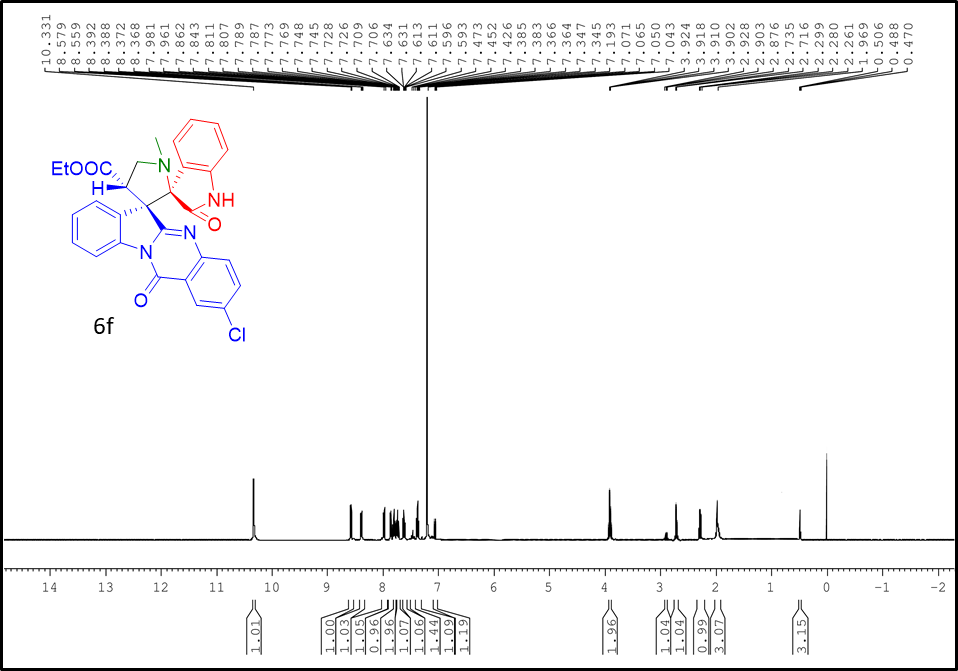


**Figure S33**: 1H NMR of compound **6f** (400 MHz, CDCl3)

**
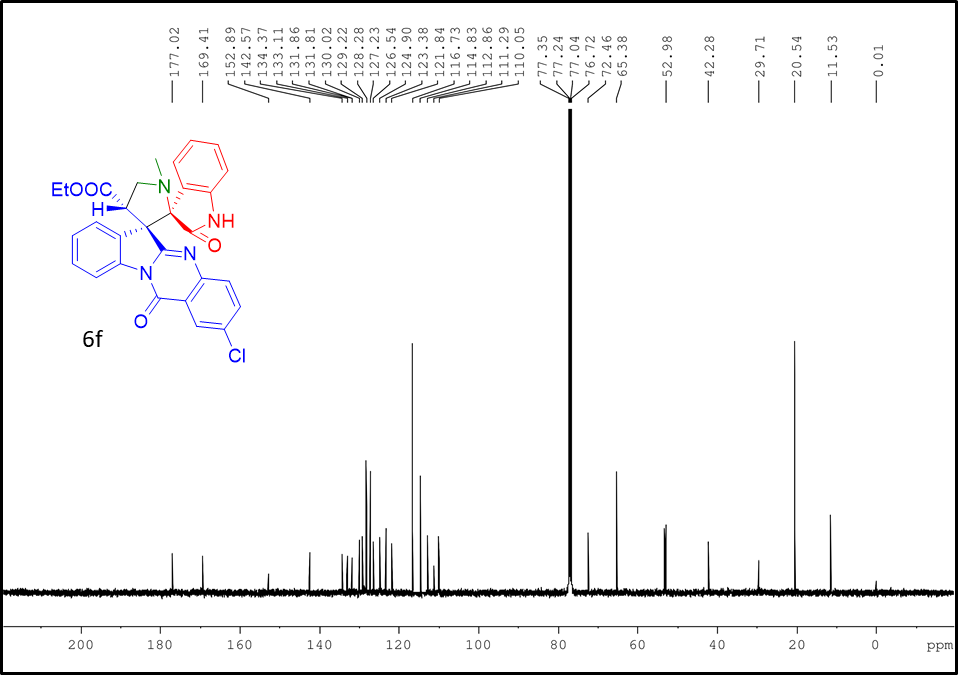
**

**Figure S34**: 13C NMR of compound **6f** (100 MHz, CDCl3)


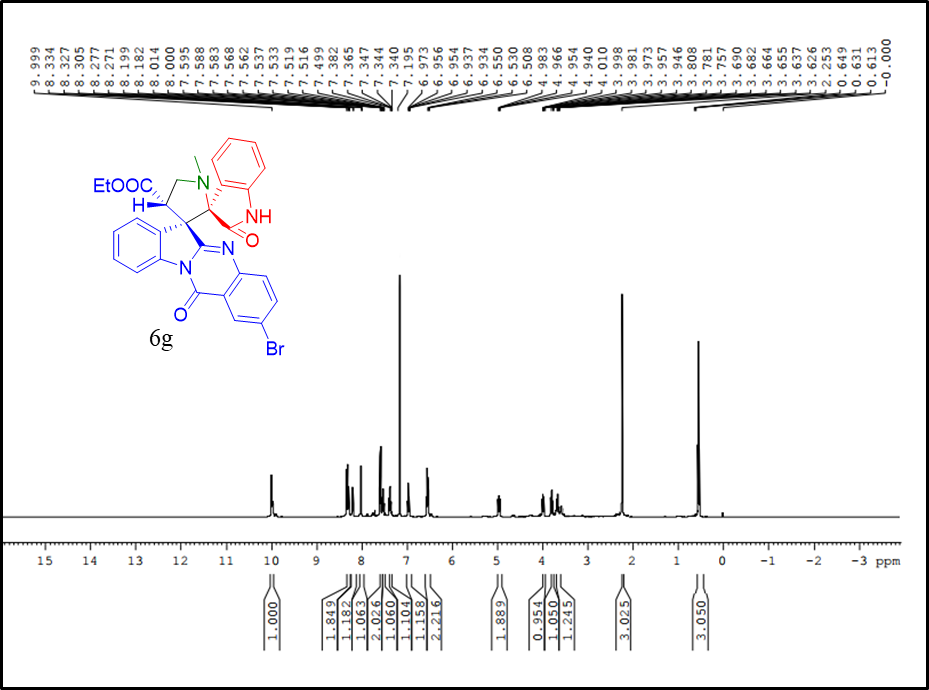


**Figure S35**: 1H NMR of compound **6g** (400 MHz, CDCl3)

**
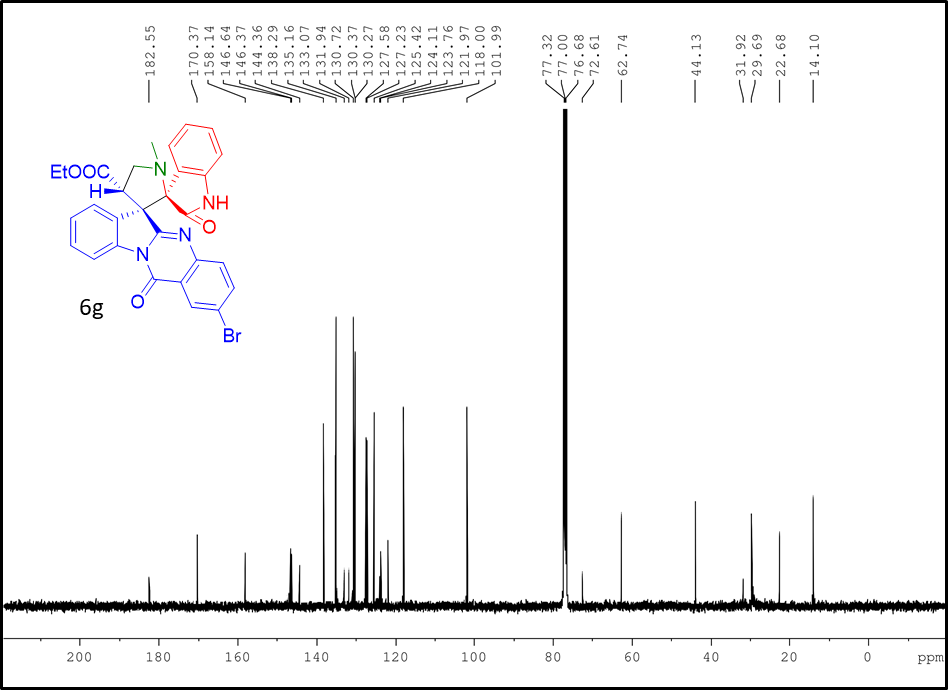
**

**Figure S36**: 13C NMR of compound **6g** (100 MHz, CDCl3)


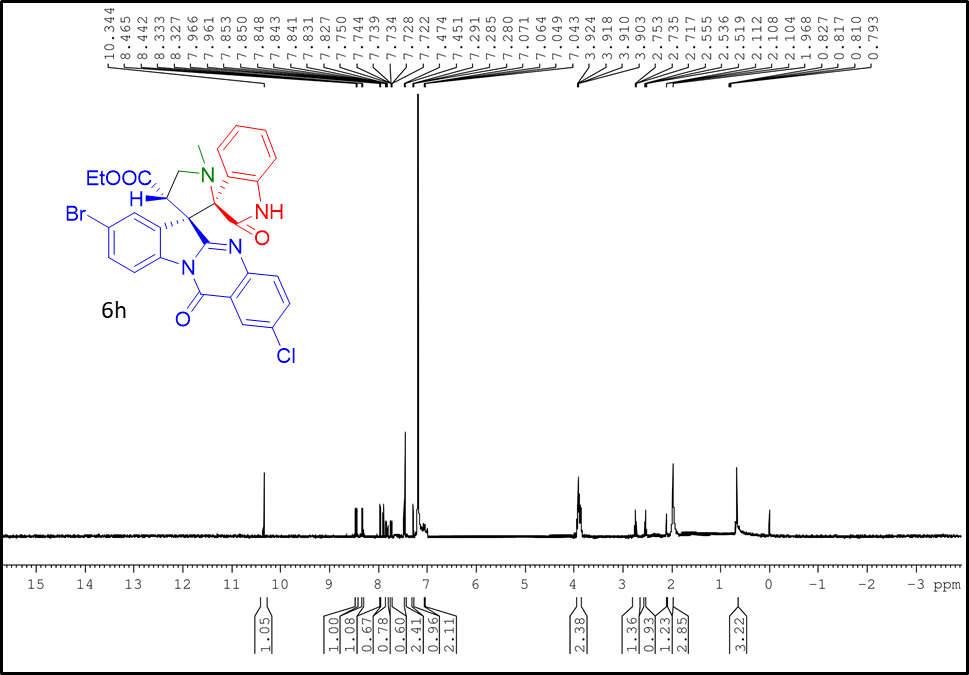


**Figure S37**: 1H NMR of compound **6h** (400 MHz, CDCl3)

**
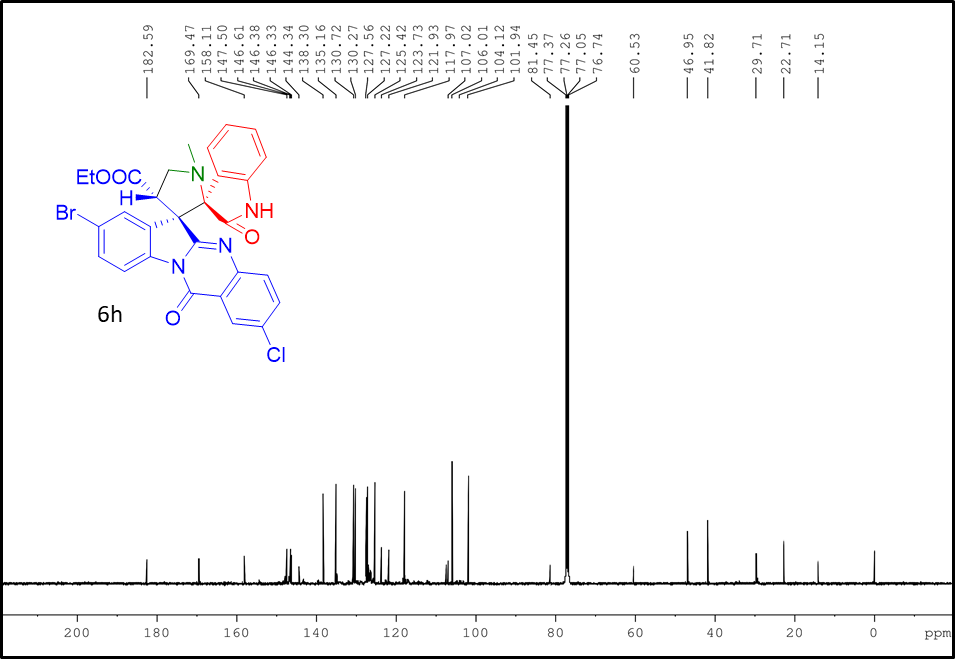
**

**Figure S38**: 13C NMR of compound **6h** (100 MHz, CDCl3)


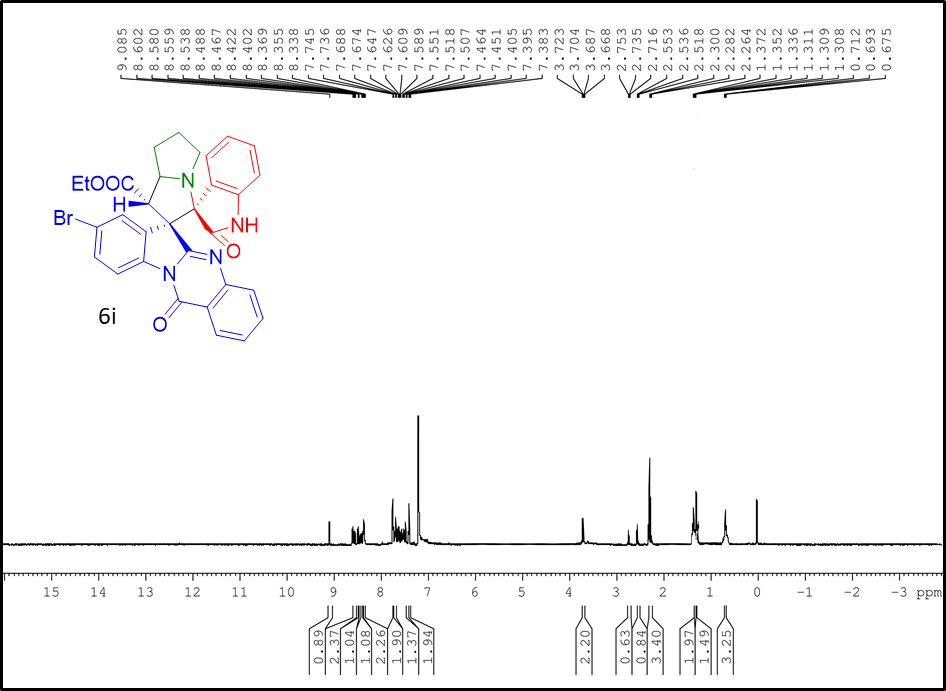


**Figure S39**: 1H NMR of compound **6i** (400 MHz, CDCl3)

**
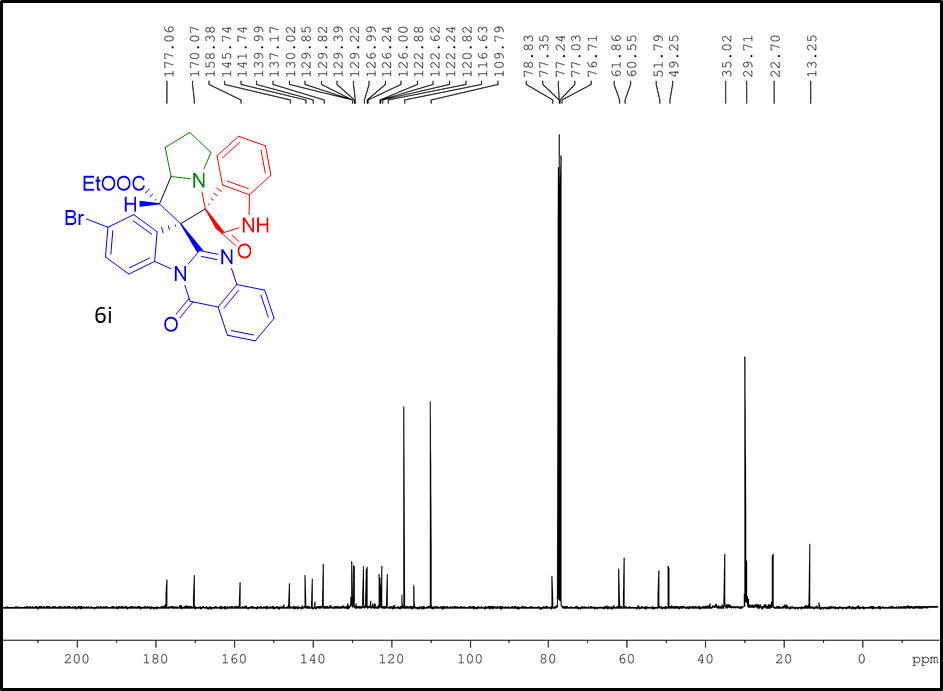
**

**Figure S40**: 13C NMR of compound **6i** (100 MHz, CDCl3)


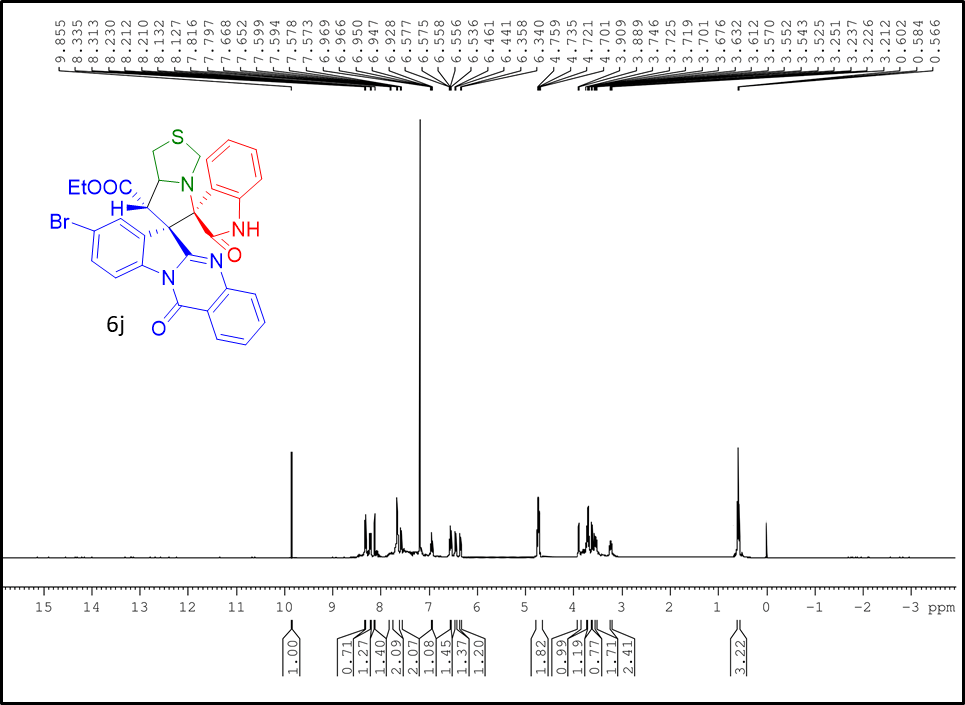


**Figure S41**: 1H NMR of compound **6j** (400 MHz, CDCl3)

**
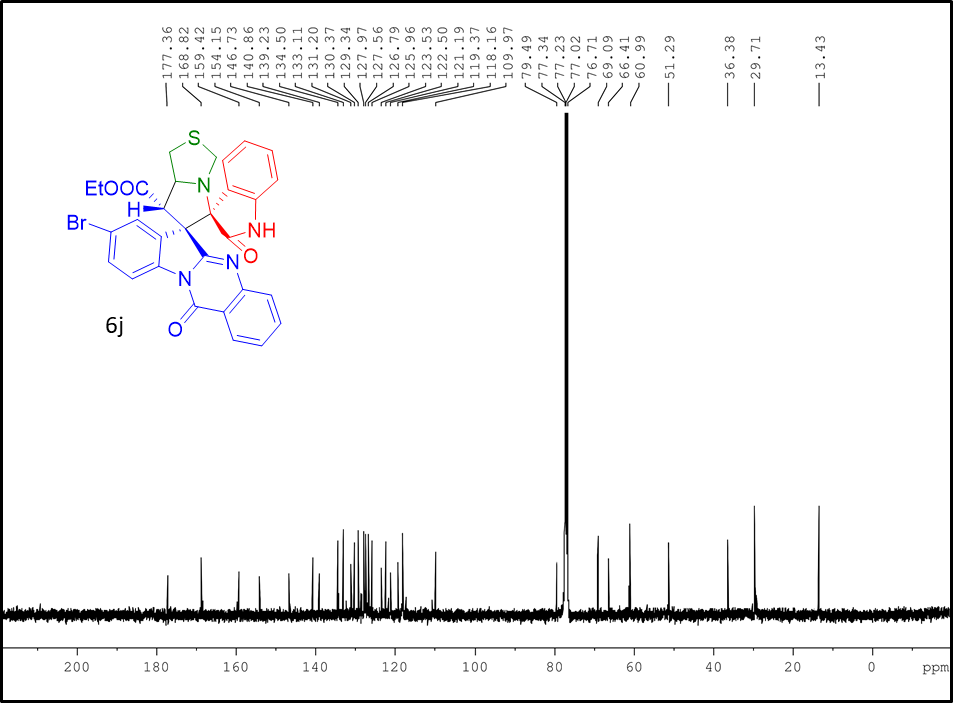
**

**Figure S42**: 13C NMR of compound **6j** (100 MHz, CDCl3)


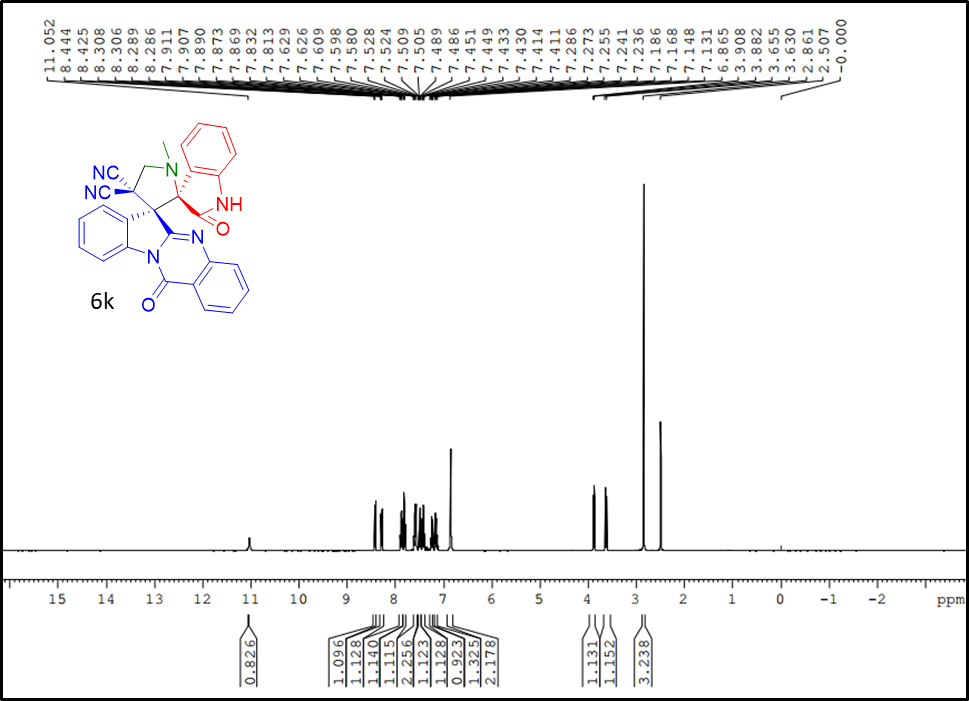


**Figure S43**: 1H NMR of compound **6k** (400 MHz, DMSO-*d6*)

**
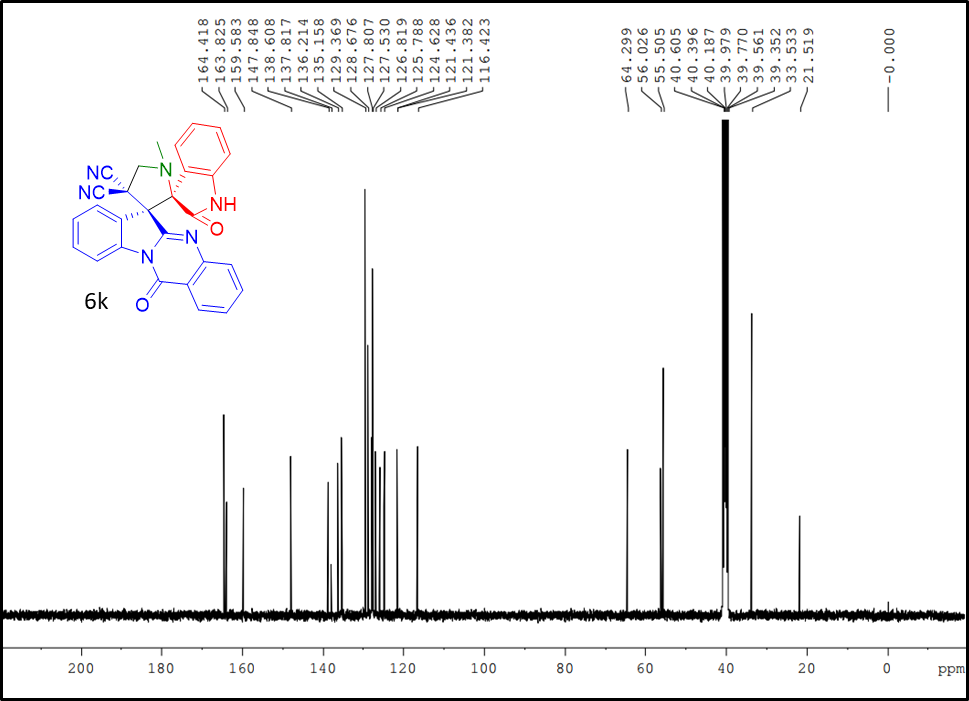
**

**Figure S44**: 13C NMR of compound **6k** (100 MHz, DMSO-*d6*)
